# Supplementary material
Source: PubMed Central journal article supplement (PMC3076858)
Supplement: 1010194108_Appendix.pdf [file 1010194108_Appendix.pdf]

# Understanding the determinants of selectivity in drug metabolism through modeling of dextromethorphan oxidation by cytochrome P450

Julianna Oláh,<sup>1</sup> Adrian J. Mulholland\* and Jeremy N. Harvey\*

School of Chemistry and Centre for Computational Chemistry, University of Bristol, Bristol BS8 1TS UK. [Adrian.mulholland@bris.ac.uk](mailto:Adrian.mulholland@bris.ac.uk), [Jeremy.harvey@bris.ac.uk](mailto:Jeremy.harvey@bris.ac.uk)

## SUPPORTING INFORMATION

- I. Dextromethorphan topology file and most important parameters
- II. Cartesian coordinates of the located stationary points in the QM only calculations
- III. Cartesian coordinates of the atoms in the QM region in the QM/MM transition states and starting structures
- IV. Fig. S1. Dextromethorphan docked into the active site of P450 2D6. The two stereoisomers of the protonated Dextromethorphan can interact either with Glu216 or with Asp301.

Fig.S2. Distances measured in the MD simulations of P450 2D6 with dextromethorphan docked into the active site. The OH distances were measured between the ferryl-oxygen atom and the alpha-hydrogen atoms (the three colors in the diagrams correspond to the three alpha-hydrogen atoms ) A: The protonated amino-group of dextromethorphan interacts with Glu216. B: protonated amino-group of dextromethorphan interacts with Asp301.

Fig.S3. Distances measured in the MD simulations of P450 2D6 with dextromethorphan docked into the active site. The OC distances were measured between the ferryl-oxygen atom and the *ortho* carbon atoms. red: simulation in which hydrogen bond exists between Glu216 and dextromethorphan blue: simulation in which hydrogen bond exists between Asp301 and dextromethorphan

Fig.S4. QM/MM adiabatic energy scan profiles for A. hydrogen-abstraction B. aromatic carbon oxidation.

- V. Table S1. Selected geometrical parameters of QM only transition states (at the B3LYP/LACVP\*\* level) and QM/MM optimized starting structures and transition states.

---

<sup>1</sup> Present address: Materials Structure and Modeling Research Group of the Hungarian Academy of Sciences, Budapest University of Technology and Economics, P.O. Box 91, 1521 Budapest, Hungary

# I. Dextromethorphan topology file and most important parameters

Non standard atom types:

MASS 210 OCE 15.99900 O ! aromatic ether oxygen  
MASS 211 NT 14.00700 N ! tertiary protonated amine nitrogen  
MASS 212 CT0 12.01100 C ! aliphatic sp<sup>3</sup> C bonded to 4 carbon atoms,

RESI DEX +1.000 ! protonated dextromethorphan

GROUP

|      |     |     |        |                   |
|------|-----|-----|--------|-------------------|
| ATOM | C1  | CT2 | -0.180 |                   |
| ATOM | C2  | CT0 | 0.000  |                   |
| ATOM | C3  | CT1 | -0.090 |                   |
| ATOM | C4  | CT2 | -0.180 |                   |
| ATOM | C5  | CT2 | -0.180 |                   |
| ATOM | C6  | CT2 | -0.180 |                   |
| ATOM | C7  | CT1 | 0.120  |                   |
| ATOM | C8  | CT2 | -0.180 |                   |
| ATOM | C9  | CA  | 0.000  |                   |
| ATOM | C10 | CA  | 0.000  |                   |
| ATOM | C11 | CA  | -0.110 |                   |
| ATOM | C12 | CA  | -0.110 |                   |
| ATOM | C13 | CA  | 0.170  |                   |
| ATOM | C14 | CA  | -0.110 |                   |
| ATOM | N15 | NT  | 0.050  |                   |
| ATOM | C16 | CT2 | 0.030  |                   |
| ATOM | C17 | CT2 | -0.180 |                   |
| ATOM | O18 | OCE | -0.340 |                   |
| ATOM | C19 | CT3 | -0.100 | Ca from the paper |
| ATOM | C20 | CT3 | -0.060 |                   |
| ATOM | H21 | HA  | 0.090  |                   |
| ATOM | H22 | HA  | 0.090  |                   |
| ATOM | H23 | HA  | 0.090  |                   |
| ATOM | H24 | HP  | 0.110  |                   |
| ATOM | H25 | HA  | 0.090  |                   |
| ATOM | H26 | HA  | 0.090  |                   |
| ATOM | H27 | HA  | 0.090  |                   |
| ATOM | H28 | HA  | 0.090  |                   |
| ATOM | H29 | HA  | 0.090  |                   |
| ATOM | H30 | HA  | 0.090  |                   |
| ATOM | H31 | HA  | 0.090  |                   |
| ATOM | H32 | HA  | 0.090  |                   |
| ATOM | H33 | HA  | 0.090  |                   |
| ATOM | H34 | HA  | 0.090  |                   |
| ATOM | H35 | HA  | 0.090  |                   |
| ATOM | H36 | HP  | 0.110  |                   |
| ATOM | H37 | HP  | 0.110  |                   |
| ATOM | H38 | HA  | 0.090  |                   |

ATOM H39 HA 0.090  
 ATOM H40 HA 0.090  
 ATOM H41 HA 0.090  
 ATOM H42 HA 0.090  
 ATOM H43 HA 0.090  
 ATOM H44 HA 0.090  
 ATOM H45 HA 0.090  
 ATOM H46 HC 0.320  
 BOND C1 C2 C1 C6 C1 H44 C1 H45  
 BOND C2 C3 C2 C10 C2 C17 C3 C4  
 BOND C3 C7 C3 H25 C4 C5 C4 H38  
 BOND C4 H39 C5 C6 C5 H40 C5 H41  
 BOND C6 H42 C6 H43 C7 C8 C7 N15  
 BOND C7 H26 C8 C9 C8 H34 C8 H35  
 BOND C9 C10 C9 C11 C10 C14 C11 C12  
 BOND C11 H36 C12 C13 C12 H37 C13 C14  
 BOND C13 O18 C14 H24 N15 C16 N15 C20  
 BOND N15 H46 C16 C17 C16 H30 C16 H31  
 BOND C17 H32 C17 H33 O18 C19 C19 H21  
 BOND C19 H22 C19 H23 C20 H27 C20 H28  
 BOND C20 H29  
 IMPR C9 C10 C11 C8  
 IMPR C10 C9 C14 C2  
 IMPR C14 C10 C13 H24  
 IMPR C13 O18 C12 C14  
 IMPR C12 C13 C11 H37  
 IMPR C11 C12 C9 H36  
 PATCHING FIRS NONE LAST NONE

#### BONDS

!  
 !V(bond) = Kb(b - b0)\*\*2  
 !  
 !Kb: kcal/mole/A\*\*2  
 !b0: A  
 !  
 !atom type Kb b0  
 !  
 CT1 NT 119.686 1.5470  
 CA OCE 369.634 1.3543  
 NT CT2 176.892 1.5194  
 NT CT3 254.400 1.4990  
 NT HC 385.785 1.0259  
 CT3 OCE 113.647 1.415  
 CT0 CT1 218.894 1.5000  
 CT0 CT2 211.180 1.5380  
 CT0 CA 387.525 1.4900

#### ANGLES

!  
 !V(angle) = Ktheta(Theta - Theta0)\*\*2  
 !

```

!V(Urey-Bradley) = Kub(S - S0)**2
!
!Ktheta: kcal/mole/rad**2
!Theta0: degrees
!Kub: kcal/mole/A**2 (Urey-Bradley)
!S0: A
!
!atom types      Ktheta  Theta0  Kub    S0
!

NT  CT1  CT1  67.700  110.0000 ! ALLOW  ALI POL
NT  CT1  CT2  67.700  110.0000 ! ALLOW  ALI POL
NT  CT2  CT2  67.700  110.0000 ! ALLOW  ALI POL
CA  CA  OCE   45.20  120.0    ! from OH1 CA  CA
CT1  NT  CT2   50.000  113.00  ! force const. from CT2 NH1 C
CT1  NT  CT3   50.000  113.00  ! force const. from CT2 NH1 C
CT2  NT  CT3   50.000  112.00  ! force const. from CT2 NH1 C
NT  CT3  HA   45.000  107.50  35.00  2.10100 ! ALLOW  ALI POL
NT  CT2  HA   45.000  107.50  35.00  2.10100 ! ALLOW  ALI POL
NT  CT1  HA   45.000  107.50  35.00  2.10100 ! ALLOW  ALI POL
HC  NT  CT1   30.000  109.50  20.00  2.07400 ! ALLOW  POL ALI
HC  NT  CT2   30.000  109.50  20.00  2.07400 ! ALLOW  POL ALI
HC  NT  CT3   30.000  109.50  20.00  2.07400 ! ALLOW  POL ALI
CA  OCE  CT3   95.000  118.71  ! from ether article cit. see above, but equilibrium value from
QM
OCE  CT3  HA    60.00  109.5  ! from ether article cit. see above
CT2  CT2  CT0  58.350  113.50  11.16  2.56100 ! ALLOW  ALI
CT2  CT1  CT0  53.350  111.00  8.00   2.56100 ! ALLOW  ALI
CT1  CT1  CT0  53.350  111.00  8.00   2.56100 ! ALLOW  ALI
HA  CT2  CT0  33.430  110.10  22.53  2.17900 ! ALLOW  ALI
CT2  CT0  CT1  53.350  109.   8.00   2.56100 ! ALLOW  ALI
CT2  CT0  CT2  53.350  110.   8.00   2.56100 ! ALLOW  ALI
CT2  CT0  CA   53.350  109.5  8.00   2.56100 ! ALLOW  ALI
CT1  CT0  CA   53.350  109.0  8.00   2.56100 ! ALLOW  ALI
CT0  CA  CA    45.800  120.6000 ! ALLOW  ALI ARO
CT0  CT1  HA   34.500  110.10  22.53  2.17900 ! ALLOW  ALI

NONBONDED nbxmod 5 atom cdiel shift vatom vdistance vswitch -
cutnb 14.0 ctofnb 12.0 ctonnb 10.0 eps 1.0 e14fac 1.0 wmin 1.5
      !adm jr., 5/08/91, suggested cutoff scheme
!
!V(Lennard-Jones) = Eps(i,j)*[(Rmin(i,j)/r(i,j))**12 - 2(Rmin(i,j)/r(i,j))**6]
!
!epsilon [kcal/mole]: Eps(i,j) = sqrt(eps(i) * eps(j))
!Rmin/2 [A]:      Rmin(i,j) = Rmin/2(i) + Rmin/2(j)
!
!atom ignored epsilon  Rmin/2 ignored eps,1-4  Rmin/2,1-4
!
NT  0.0  -0.2000  1.8500  !
OCE  0.0  -0.1521  1.7700  !
CT0  0.0  -0.0200  2.275 0.0 -0.01 1.9 ! from CT, from CT1x: needs work
END

```

II. Cartesian coordinates of the located stationary points in the QM only calculations

anisole  
B3LYP/lacvp\*\*

|              |           |         |         |
|--------------|-----------|---------|---------|
| Total energy | -346.7766 |         |         |
| C1           | -5.9001   | 4.1158  | -0.9640 |
| C2           | -6.8994   | 3.4786  | -1.6947 |
| C3           | -4.6300   | 3.5327  | -0.8923 |
| C4           | -4.3659   | 2.3321  | -1.5405 |
| C5           | -5.3768   | 1.6948  | -2.2755 |
| C6           | -6.6502   | 2.2699  | -2.3531 |
| O7           | -5.0173   | 0.5207  | -2.8753 |
| C8           | -5.9950   | -0.1713 | -3.6333 |
| H9           | -6.8521   | -0.4698 | -3.0153 |
| H10          | -6.3563   | 0.4310  | -4.4772 |
| H11          | -5.5020   | -1.0660 | -4.0173 |
| H12          | -7.4447   | 1.7939  | -2.9155 |
| H13          | -3.8398   | 4.0177  | -0.3255 |
| H14          | -3.3873   | 1.8652  | -1.4955 |
| H15          | -6.1034   | 5.0539  | -0.4567 |
| H16          | -7.8906   | 3.9193  | -1.7594 |

Compound I (doublet)  
B3LYP/lacvp\*\*

|              |             |         |        |
|--------------|-------------|---------|--------|
| Total energy | -1585.81392 |         |        |
| N1           | 1.4132      | 1.3895  | 0.0722 |
| C2           | 2.7773      | 1.1986  | 0.0760 |
| C3           | 1.2257      | 2.7528  | 0.0891 |
| C4           | 3.4587      | 2.4695  | 0.0619 |
| H5           | 4.5340      | 2.5902  | 0.0508 |
| C6           | 2.4981      | 3.4314  | 0.0729 |
| H7           | 2.6205      | 4.5065  | 0.0712 |
| N8           | 1.4124      | -1.4551 | 0.1326 |
| C9           | 2.7682      | -1.2684 | 0.1381 |
| C10          | 1.2200      | -2.8122 | 0.1574 |
| C11          | 2.4881      | -3.4990 | 0.1695 |
| H12          | 2.6062      | -4.5743 | 0.1829 |
| C13          | 3.4518      | -2.5387 | 0.1586 |
| H14          | 4.5269      | -2.6605 | 0.1613 |
| N15          | -1.4360     | -1.4505 | 0.1410 |
| C16          | -1.2483     | -2.8064 | 0.1550 |
| C17          | -2.7900     | -1.2596 | 0.1242 |
| C18          | -2.5184     | -3.4906 | 0.1457 |
| H19          | -2.6394     | -4.5656 | 0.1498 |
| C20          | -3.4788     | -2.5274 | 0.1257 |
| H21          | -4.5543     | -2.6452 | 0.1104 |
| N22          | -1.4303     | 1.3953  | 0.1057 |
| C23          | -1.2388     | 2.7522  | 0.1217 |
| C24          | -2.7903     | 1.2081  | 0.0971 |
| C25          | -3.4718     | 2.4797  | 0.0949 |
| H26          | -4.5468     | 2.6024  | 0.0804 |
| C27          | -2.5081     | 3.4385  | 0.1152 |
| H28          | -2.6255     | 4.5138  | 0.1186 |
| C29          | 3.4085      | -0.0333 | 0.1110 |

|      |         |         |         |
|------|---------|---------|---------|
| C30  | -0.0042 | 3.3884  | 0.1282  |
| C31  | -3.4262 | -0.0234 | 0.0998  |
| C32  | -0.0150 | -3.4452 | 0.1631  |
| H33  | 4.4940  | -0.0360 | 0.1181  |
| H34  | -0.0033 | 4.4737  | 0.1475  |
| H35  | -4.5118 | -0.0230 | 0.0879  |
| H36  | -0.0173 | -4.5308 | 0.1755  |
| Fe37 | -0.0128 | -0.0346 | 0.2616  |
| O38  | 0.0124  | 0.0022  | 1.8853  |
| S39  | 0.0751  | 0.2628  | -2.2997 |
| H40  | 1.3416  | -0.1650 | -2.4815 |

Compound I (quartet)  
B3LYP/lacvp\*\*

|              |             |         |         |
|--------------|-------------|---------|---------|
| Total energy | -1585.81393 |         |         |
| N1           | 1.4124      | 1.3907  | 0.0776  |
| C2           | 2.7772      | 1.1999  | 0.0766  |
| C3           | 1.2253      | 2.7546  | 0.0901  |
| C4           | 3.4582      | 2.4706  | 0.0574  |
| H5           | 4.5334      | 2.5913  | 0.0431  |
| C6           | 2.4975      | 3.4324  | 0.0688  |
| H7           | 2.6197      | 4.5072  | 0.0640  |
| N8           | 1.4148      | -1.4518 | 0.1329  |
| C9           | 2.7704      | -1.2664 | 0.1410  |
| C10          | 1.2212      | -2.8091 | 0.1552  |
| C11          | 2.4890      | -3.4967 | 0.1696  |
| H12          | 2.6064      | -4.5720 | 0.1822  |
| C13          | 3.4534      | -2.5371 | 0.1621  |
| H14          | 4.5285      | -2.6594 | 0.1670  |
| N15          | -1.4358     | -1.4483 | 0.1358  |
| C16          | -1.2476     | -2.8036 | 0.1510  |
| C17          | -2.7893     | -1.2577 | 0.1228  |
| C18          | -2.5175     | -3.4885 | 0.1464  |
| H19          | -2.6382     | -4.5636 | 0.1528  |
| C20          | -3.4781     | -2.5256 | 0.1280  |
| H21          | -4.5536     | -2.6436 | 0.1165  |
| N22          | -1.4284     | 1.3990  | 0.1094  |
| C23          | -1.2385     | 2.7559  | 0.1247  |
| C24          | -2.7887     | 1.2105  | 0.0974  |
| C25          | -3.4709     | 2.4818  | 0.0942  |
| H26          | -4.5459     | 2.6036  | 0.0777  |
| C27          | -2.5080     | 3.4414  | 0.1164  |
| H28          | -2.6262     | 4.5166  | 0.1194  |
| C29          | 3.4098      | -0.0309 | 0.1137  |
| C30          | -0.0035     | 3.3916  | 0.1313  |
| C31          | -3.4247     | -0.0209 | 0.0986  |
| C32          | -0.0137     | -3.4419 | 0.1577  |
| H33          | 4.4954      | -0.0321 | 0.1207  |
| H34          | -0.0015     | 4.4769  | 0.1497  |
| H35          | -4.5103     | -0.0198 | 0.0862  |
| H36          | -0.0158     | -4.5275 | 0.1687  |
| Fe37         | -0.0100     | -0.0285 | 0.2600  |
| O38          | -0.0053     | -0.0302 | 1.8864  |
| S39          | 0.0748      | 0.2629  | -2.2912 |
| H40          | 1.3364      | -0.1777 | -2.4766 |

H-abstraction TS state (quartet)  
B3LYP/lacvp\*\*

|              |            |         |         |
|--------------|------------|---------|---------|
| Total energy | -1932.5661 |         |         |
| H1           | 2.8484     | 0.6010  | -0.2950 |
| S2           | 2.3318     | -0.5772 | 0.1099  |

|                                  |             |         |         |                                              |             |         |         |
|----------------------------------|-------------|---------|---------|----------------------------------------------|-------------|---------|---------|
| O5                               | -1.6447     | 0.4082  | -0.1292 | Fe6                                          | 0.0532      | 0.0307  | -0.0036 |
| Fe6                              | 0.0348      | 0.0467  | 0.0807  | N7                                           | 0.2721      | -0.0375 | -1.9897 |
| N7                               | 0.2923      | -0.0265 | -1.9561 | N8                                           | -0.2687     | -1.9552 | 0.0324  |
| N8                               | -0.2786     | -1.9455 | 0.0878  | N9                                           | -0.1577     | 0.1009  | 2.0207  |
| N9                               | -0.1653     | 0.1043  | 2.0569  | N10                                          | 0.5581      | 1.9815  | -0.0077 |
| N10                              | 0.5492      | 1.9871  | 0.0566  | C11                                          | 0.5849      | 1.0119  | -2.8207 |
| C11                              | 0.5663      | 1.0269  | -2.7857 | C12                                          | 0.6849      | 0.5503  | -4.1819 |
| C12                              | 0.6524      | 0.5743  | -4.1541 | C13                                          | 0.4561      | -0.7904 | -4.1625 |
| C13                              | 0.4410      | -0.7691 | -4.1357 | C14                                          | 0.2071      | -1.1538 | -2.7904 |
| C14                              | 0.2156      | -1.1363 | -2.7575 | C15                                          | -0.2888     | -2.8071 | -1.0406 |
| C15                              | -0.2944     | -2.7887 | -0.9973 | C16                                          | -0.6255     | -4.1395 | -0.6072 |
| C16                              | -0.6344     | -4.1253 | -0.5770 | C17                                          | -0.8233     | -4.0762 | 0.7379  |
| C17                              | -0.8377     | -4.0759 | 0.7678  | C18                                          | -0.6010     | -2.7078 | 1.1316  |
| C18                              | -0.6164     | -2.7098 | 1.1720  | C19                                          | -0.5130     | -0.9362 | 2.8386  |
| C19                              | -0.5164     | -0.9365 | 2.8799  | C20                                          | -0.6064     | -0.4771 | 4.2050  |
| C20                              | -0.5781     | -0.4872 | 4.2512  | C21                                          | -0.2918     | 0.8455  | 4.1964  |
| C21                              | -0.2419     | 0.8293  | 4.2490  | C22                                          | -0.0123     | 1.1983  | 2.8240  |
| C22                              | 0.0183      | 1.1907  | 2.8753  | C23                                          | 0.6056      | 2.8200  | 1.0786  |
| C23                              | 0.6313      | 2.8238  | 1.1375  | C24                                          | 0.9193      | 4.1601  | 0.6500  |
| C24                              | 0.9439      | 4.1640  | 0.7080  | C25                                          | 1.0353      | 4.1252  | -0.7054 |
| C25                              | 1.0237      | 4.1319  | -0.6497 | C26                                          | 0.8008      | 2.7619  | -1.1083 |
| C26                              | 0.7727      | 2.7701  | -1.0514 | C27                                          | 0.8137      | 2.3185  | -2.4227 |
| C27                              | 0.7724      | 2.3357  | -2.3693 | H28                                          | 1.0328      | 3.0472  | -3.1958 |
| H28                              | 0.9689      | 3.0787  | -3.1359 | C29                                          | -0.0569     | -2.4437 | -2.3600 |
| C29                              | -0.0586     | -2.4228 | -2.3156 | H30                                          | -0.0888     | -3.2268 | -3.1101 |
| H30                              | -0.1006     | -3.2086 | -3.0630 | C31                                          | -0.7242     | -2.2445 | 2.4328  |
| C31                              | -0.7351     | -2.2439 | 2.4757  | H32                                          | -0.9979     | -2.9672 | 3.1946  |
| H32                              | -1.0054     | -2.9648 | 3.2408  | C33                                          | 0.3549      | 2.4643  | 2.3954  |
| C33                              | 0.4029      | 2.4542  | 2.4573  | H34                                          | 0.4360      | 3.2438  | 3.1458  |
| H34                              | 0.5104      | 3.2221  | 3.2170  | C35                                          | -4.1108     | 5.2474  | -1.8316 |
| C35                              | -4.1089     | 5.2227  | -1.8720 | C36                                          | -3.9199     | 4.2815  | -0.8440 |
| C36                              | -3.9560     | 4.2246  | -0.9093 | C37                                          | -3.8617     | 4.9260  | -3.1690 |
| C37                              | -3.8238     | 4.9380  | -3.2109 | C38                                          | -3.4363     | 3.6482  | -3.5171 |
| C38                              | -3.3985     | 3.6669  | -3.5840 | C39                                          | -3.2607     | 2.6864  | -2.5166 |
| C39                              | -3.2562     | 2.6730  | -2.6085 | C40                                          | -3.4914     | 2.9940  | -1.1723 |
| C40                              | -3.5267     | 2.9437  | -1.2631 | O41                                          | -2.8386     | 1.4507  | -2.9500 |
| O41                              | -2.8257     | 1.4506  | -3.0666 | C42                                          | -3.0021     | 0.3572  | -2.1254 |
| C42                              | -2.9885     | 0.3319  | -2.2711 | H43                                          | -2.2130     | 0.3820  | -1.1453 |
| H43                              | -2.1735     | 0.3482  | -1.1977 | H44                                          | -3.9858     | 0.3113  | -1.6450 |
| H44                              | -3.9781     | 0.2602  | -1.8060 | H45                                          | -2.7370     | -0.5420 | -2.6805 |
| H45                              | -2.6933     | -0.5481 | -2.8405 | H46                                          | -3.2954     | 2.2630  | -0.3956 |
| H46                              | -3.3591     | 2.1880  | -0.5035 | H47                                          | -4.0025     | 5.6733  | -3.9451 |
| H47                              | -3.9368     | 5.7087  | -3.9691 | H48                                          | -3.2410     | 3.3731  | -4.5492 |
| H48                              | -3.1773     | 3.4210  | -4.6180 | H50                                          | 0.9131      | 1.1844  | -5.0286 |
| H50                              | 0.8555      | 1.2140  | -5.0029 | H51                                          | 0.4563      | -1.4873 | -4.9901 |
| H51                              | 0.4337      | -1.4622 | -4.9664 | H52                                          | -0.7051     | -4.9974 | -1.2619 |
| H52                              | -0.7107     | -4.9773 | -1.2398 | H53                                          | -1.0972     | -4.8719 | 1.4178  |
| H53                              | -1.1136     | -4.8786 | 1.4385  | H54                                          | -0.8713     | -1.1033 | 5.0469  |
| H54                              | -0.8358     | -1.1170 | 5.0927  | H55                                          | -0.2460     | 1.5349  | 5.0290  |
| H55                              | -0.1681     | 1.5091  | 5.0878  | H56                                          | 1.0204      | 5.0080  | 1.3144  |
| H56                              | 1.0683      | 5.0093  | 1.3715  | H57                                          | 1.2527      | 4.9374  | -1.3861 |
| H57                              | 1.2296      | 4.9448  | -1.3330 | H58                                          | -4.4432     | 6.2456  | -1.5625 |
| H58                              | -4.4413     | 6.2156  | -1.5827 | H59                                          | -4.0945     | 4.5289  | 0.1999  |
| H59                              | -4.1615     | 4.4408  | 0.1357  |                                              |             |         |         |
|                                  |             |         |         | Aromatic carbon oxidation TS state (quartet) |             |         |         |
|                                  |             |         |         | B3LYP/lacvp**                                |             |         |         |
|                                  |             |         |         | Total energy                                 | -1932.56361 |         |         |
| H-abstraction TS state (doublet) |             |         |         | H1                                           | 0.3855      | -1.1708 | -0.3736 |
| B3LYP/lacvp**                    |             |         |         | S2                                           | 0.4214      | 0.0330  | 0.2334  |
| Total energy                     | -1932.56722 |         |         | O5                                           | -3.4909     | 1.0890  | -0.4028 |
| H1                               | 2.8029      | 0.7039  | 0.4439  | Fe6                                          | -1.8817     | 0.5907  | -0.0689 |
| S2                               | 2.3082      | -0.5462 | 0.3526  |                                              |             |         |         |
| O5                               | -1.6257     | 0.4014  | -0.0139 |                                              |             |         |         |

|     |         |         |         |     |         |         |         |
|-----|---------|---------|---------|-----|---------|---------|---------|
| N7  | -1.4556 | 0.3872  | -2.0578 | N8  | -2.3939 | -1.3394 | -0.0447 |
| N8  | -2.4090 | -1.3376 | 0.0061  | N9  | -2.1835 | 0.7866  | 1.8573  |
| N9  | -2.1896 | 0.7715  | 1.8948  | N10 | -1.2163 | 2.5159  | -0.1913 |
| N10 | -1.1796 | 2.4957  | -0.1357 | C11 | -0.8224 | 1.3366  | -2.8929 |
| C11 | -0.9128 | 1.3379  | -2.8860 | C12 | -0.6777 | 0.8012  | -4.2219 |
| C12 | -0.7941 | 0.8144  | -4.2258 | C13 | -1.1795 | -0.4645 | -4.1950 |
| C13 | -1.2731 | -0.4592 | -4.1938 | C14 | -1.6196 | -0.7142 | -2.8466 |
| C14 | -1.6787 | -0.7177 | -2.8329 | C15 | -2.5013 | -2.2056 | -1.0968 |
| C15 | -2.5166 | -2.2053 | -1.0540 | C16 | -2.9924 | -3.4848 | -0.6383 |
| C16 | -3.0000 | -3.4851 | -0.5946 | C17 | -3.1730 | -3.3746 | 0.7046  |
| C17 | -3.1805 | -3.3795 | 0.7495  | C18 | -2.8043 | -2.0253 | 1.0663  |
| C18 | -2.8174 | -2.0316 | 1.1142  | C19 | -2.6173 | -0.1969 | 2.7048  |
| C19 | -2.6195 | -0.2068 | 2.7521  | C20 | -2.7943 | 0.3394  | 4.0344  |
| C20 | -2.7494 | 0.3252  | 4.0884  | C21 | -2.4756 | 1.6593  | 3.9711  |
| C21 | -2.3945 | 1.6354  | 4.0258  | C22 | -2.0923 | 1.9281  | 2.6044  |
| C22 | -2.0379 | 1.9059  | 2.6526  | C23 | -1.2438 | 3.4204  | 0.8397  |
| C23 | -1.1663 | 3.3944  | 0.8940  | C24 | -0.7159 | 4.6882  | 0.3985  |
| C24 | -0.6471 | 4.6622  | 0.4409  | C25 | -0.3498 | 4.5318  | -0.9028 |
| C25 | -0.3448 | 4.5130  | -0.8778 | C26 | -0.6665 | 3.1712  | -1.2628 |
| C26 | -0.6847 | 3.1556  | -1.2322 | C27 | -0.4699 | 2.6258  | -2.5229 |
| C27 | -0.5551 | 2.6248  | -2.5084 | H28 | -0.0242 | 3.2607  | -3.2815 |
| H28 | -0.1450 | 3.2727  | -3.2764 | C29 | -2.1537 | -1.9175 | -2.4087 |
| C29 | -2.1903 | -1.9249 | -2.3723 | H30 | -2.2770 | -2.7047 | -3.1453 |
| H30 | -2.3220 | -2.7213 | -3.0981 | C31 | -2.8928 | -1.5088 | 2.3501  |
| C31 | -2.9033 | -1.5172 | 2.4003  | H32 | -3.2331 | -2.1770 | 3.1349  |
| H32 | -3.2387 | -2.1861 | 3.1864  | C33 | -1.6682 | 3.1625  | 2.1349  |
| C33 | -1.5748 | 3.1286  | 2.1957  | H34 | -1.6347 | 3.9834  | 2.8438  |
| H34 | -1.5047 | 3.9371  | 2.9161  | C35 | -5.4670 | 3.7829  | -0.8353 |
| C35 | -5.5595 | 3.7870  | -0.9105 | C36 | -6.6438 | 3.0196  | -0.7577 |
| C36 | -6.7133 | 2.9842  | -0.8464 | C37 | -4.3334 | 3.2383  | -1.4083 |
| C37 | -4.3932 | 3.2787  | -1.4452 | C38 | -4.3288 | 1.8882  | -1.8579 |
| C38 | -4.3151 | 1.9102  | -1.8548 | C39 | -5.5684 | 1.1658  | -1.8548 |
| C39 | -5.5425 | 1.1550  | -1.8900 | C40 | -6.7047 | 1.7200  | -1.2675 |
| C40 | -6.7110 | 1.6755  | -1.3435 | O41 | -5.5083 | -0.0514 | -2.4295 |
| O41 | -5.4228 | -0.0649 | -2.4595 | C42 | -6.6401 | -0.9090 | -2.3322 |
| C42 | -6.5393 | -0.9441 | -2.4221 | H43 | -6.8985 | -1.1019 | -1.2849 |
| H43 | -6.8428 | -1.1543 | -1.3897 | H44 | -7.5081 | -0.4855 | -2.8523 |
| H44 | -7.3924 | -0.5323 | -2.9761 | H45 | -6.3487 | -1.8429 | -2.8132 |
| H45 | -6.2092 | -1.8678 | -2.8987 | H46 | -7.6342 | 1.1661  | -1.2145 |
| H46 | -7.6232 | 1.0912  | -1.3164 | H47 | -3.4157 | 3.8104  | -1.4821 |
| H47 | -3.4982 | 3.8873  | -1.5127 | H48 | -3.5532 | 1.5364  | -2.5271 |
| H48 | -3.5419 | 1.6055  | -2.5494 | H50 | -0.2506 | 1.3398  | -5.0578 |
| H50 | -0.3946 | 1.3641  | -5.0682 | H51 | -1.2451 | -1.1803 | -5.0037 |
| H51 | -1.3457 | -1.1725 | -5.0040 | H52 | -3.1590 | -4.3442 | -1.2745 |
| H52 | -3.1661 | -4.3433 | -1.2324 | H53 | -3.5246 | -4.1228 | 1.4027  |
| H53 | -3.5302 | -4.1307 | 1.4452  | H54 | -3.1263 | -0.2352 | 4.8889  |
| H54 | -3.0722 | -0.2468 | 4.9481  | H55 | -2.4860 | 2.3960  | 4.7639  |
| H55 | -2.3611 | 2.3652  | 4.8244  | H56 | -0.6288 | 5.5675  | 1.0230  |
| H56 | -0.5299 | 5.5381  | 1.0652  | H57 | 0.0947  | 5.2572  | -1.5712 |
| H57 | 0.0697  | 5.2418  | -1.5617 | H58 | -5.4557 | 4.7990  | -0.4537 |
| H58 | -5.5968 | 4.8127  | -0.5554 | H59 | -7.5337 | 3.4484  | -0.3053 |
| H59 | -7.6295 | 3.3875  | -0.4242 |     |         |         |         |

Aromatic carbon oxidation TS state (doublet)

B3LYP/lacvp\*\*

|              |             |         |         |
|--------------|-------------|---------|---------|
| Total energy | -1932.56653 |         |         |
| H1           | 0.5135      | -0.9766 | -0.5152 |
| S2           | 0.3413      | -0.1021 | 0.4969  |
| O5           | -3.5103     | 0.9850  | -0.3491 |
| Fe6          | -1.8677     | 0.6156  | -0.1383 |
| N7           | -1.3992     | 0.3982  | -2.0678 |

Dextromethorphan stereoisomer A

B3LYP/6-31G\*

|              |             |        |         |
|--------------|-------------|--------|---------|
| Total energy | -831.340769 |        |         |
| C1           | -0.6418     | 2.3642 | 0.1102  |
| C2           | -0.6921     | 0.8139 | 0.1818  |
| C3           | -1.7449     | 0.2974 | -0.8475 |
| C4           | -3.1247     | 0.9796 | -0.7456 |
| C5           | -2.9903     | 2.5045 | -0.8670 |
| C6           | -2.0164     | 3.0517 | 0.1835  |

|     |         |         |         |     |         |         |         |
|-----|---------|---------|---------|-----|---------|---------|---------|
| C7  | -1.8035 | -1.2345 | -0.7934 | O18 | 4.1692  | 0.8428  | 0.5394  |
| C8  | -0.4753 | -1.8370 | -1.2482 | C19 | 5.4682  | 0.2833  | 0.3535  |
| C9  | 0.7541  | -1.0929 | -0.7523 | C20 | -3.5532 | -1.7181 | 1.1070  |
| C10 | 0.6750  | 0.1717  | -0.1280 | H21 | 6.1634  | 1.0016  | 0.7892  |
| C11 | 2.0093  | -1.6734 | -0.9543 | H22 | 5.5653  | -0.6786 | 0.8718  |
| C12 | 3.1867  | -1.0478 | -0.5555 | H23 | 5.6969  | 0.1533  | -0.7111 |
| C13 | 3.1098  | 0.2026  | 0.0704  | H24 | 1.8659  | 1.7387  | 0.7948  |
| C14 | 1.8560  | 0.7937  | 0.2793  | H25 | -1.3698 | 0.5351  | -1.8363 |
| N15 | -2.2181 | -1.6668 | 0.6350  | H26 | -2.6922 | -1.5660 | -1.3055 |
| C16 | -1.2797 | -1.1564 | 1.7168  | H27 | -4.1360 | -2.1727 | 0.3043  |
| C17 | -1.1120 | 0.3563  | 1.6098  | H28 | -3.9008 | -0.7047 | 1.2893  |
| O18 | 4.1714  | 0.9168  | 0.5147  | H29 | -3.6488 | -2.3123 | 2.0177  |
| C19 | 5.4810  | 0.3809  | 0.3363  | H30 | -0.2348 | -1.5014 | 1.6702  |
| C20 | -2.4819 | -3.1363 | 0.7698  | H31 | -1.6387 | -1.3325 | 2.7438  |
| H21 | 6.1618  | 1.1191  | 0.7615  | H32 | -2.0768 | 0.9437  | 1.8804  |
| H22 | 5.5972  | -0.5715 | 0.8682  | H33 | -0.3871 | 0.8212  | 2.3366  |
| H23 | 5.7123  | 0.2403  | -0.7264 | H34 | -0.4882 | -2.8573 | -1.0435 |
| H24 | 1.8476  | 1.7597  | 0.7713  | H35 | -0.6003 | -1.7194 | -2.3581 |
| H25 | -1.3560 | 0.5306  | -1.8482 | H36 | 1.9956  | -2.6448 | -1.4662 |
| H26 | -2.6207 | -1.6154 | -1.4159 | H37 | 4.0851  | -1.5895 | -0.7382 |
| H27 | -1.5391 | -3.6785 | 0.7090  | H38 | -3.6230 | 0.9635  | 0.1891  |
| H28 | -3.1508 | -3.4554 | -0.0315 | H39 | -3.7816 | 0.6953  | -1.5405 |
| H29 | -2.9476 | -3.3200 | 1.7400  | H40 | -2.4969 | 2.7863  | -1.9877 |
| H30 | -0.3349 | -1.6848 | 1.5786  | H41 | -3.8646 | 3.1316  | -0.9353 |
| H31 | -1.7155 | -1.4559 | 2.6743  | H42 | -2.3976 | 3.0931  | 1.0665  |
| H32 | -2.0387 | 0.8501  | 1.9247  | H43 | -1.7520 | 4.2284  | -0.1006 |
| H33 | -0.3429 | 0.6528  | 2.3312  | H44 | -0.0735 | 2.6472  | -0.8927 |
| H34 | -0.4109 | -2.9051 | -1.0063 | H45 | 0.0511  | 2.8123  | 0.8498  |
| H35 | -0.5096 | -1.8045 | -2.3467 | H46 | -1.8150 | -2.6769 | 0.6764  |
| H36 | 2.0735  | -2.6452 | -1.4401 |     |         |         |         |
| H37 | 4.1395  | -1.5330 | -0.7311 |     |         |         |         |
| H38 | -3.6272 | 0.7510  | 0.2088  |     |         |         |         |
| H39 | -3.7767 | 0.5885  | -1.5376 |     |         |         |         |
| H40 | -2.6251 | 2.7500  | -1.8739 |     |         |         |         |
| H41 | -3.9736 | 2.9766  | -0.7668 |     |         |         |         |
| H42 | -2.4529 | 2.9352  | 1.1853  |     |         |         |         |
| H43 | -1.8780 | 4.1294  | 0.0426  |     |         |         |         |
| H44 | -0.1528 | 2.6404  | -0.8326 |     |         |         |         |
| H45 | -0.0052 | 2.7521  | 0.9127  |     |         |         |         |
| H46 | -3.1144 | -1.1923 | 0.7893  |     |         |         |         |

Dextromethorphan stereoisomer B  
B3LYP/6-31G\*

|              |            |         |         |
|--------------|------------|---------|---------|
| Total energy | -831.33474 |         |         |
| C1           | -0.5874    | 2.4214  | 0.0502  |
| C2           | -0.6911    | 0.8764  | 0.1727  |
| C3           | -1.7663    | 0.3549  | -0.8266 |
| C4           | -3.1131    | 1.1045  | -0.7718 |
| C5           | -2.9024    | 2.6099  | -0.9816 |
| C6           | -1.9349    | 3.1620  | 0.0718  |
| C7           | -1.8430    | -1.1764 | -0.7360 |
| C8           | -0.5382    | -1.7794 | -1.2624 |
| C9           | 0.7110     | -1.0685 | -0.7674 |
| C10          | 0.6591     | 0.1929  | -0.1308 |
| C11          | 1.9528     | -1.6768 | -0.9708 |
| C12          | 3.1435     | -1.0837 | -0.5607 |
| C13          | 3.0936     | 0.1600  | 0.0808  |
| C14          | 1.8531     | 0.7784  | 0.2918  |
| N15          | -2.1031    | -1.6946 | 0.7090  |
| C16          | -1.2187    | -1.0431 | 1.7771  |
| C17          | -1.1276    | 0.4693  | 1.6094  |



III. Cartesian coordinates of the atoms in the QM region in the QM/MM transition states and starting structures

| Snapshot 1 TS                   |        |        |        |
|---------------------------------|--------|--------|--------|
| &zmat Aromatic carbon oxidation |        |        |        |
| C1                              | 2.592  | -0.748 | -0.456 |
| S2                              | 1.567  | -0.243 | 0.977  |
| H3                              | 3.172  | -1.635 | -0.173 |
| H4                              | 1.929  | -1.034 | -1.278 |
| O5                              | -2.739 | 0.889  | 0.141  |
| Fe6                             | -1.060 | 0.351  | 0.298  |
| N7                              | -0.712 | 0.056  | -1.653 |
| N8                              | -1.310 | -1.692 | 0.498  |
| N9                              | -0.976 | 0.498  | 2.307  |
| N10                             | -0.406 | 2.224  | 0.142  |
| C11                             | -0.459 | 1.034  | -2.587 |
| C12                             | -0.617 | 0.514  | -3.919 |
| C13                             | -0.887 | -0.815 | -3.785 |
| C14                             | -0.960 | -1.086 | -2.373 |
| C15                             | -1.428 | -2.623 | -0.503 |
| C16                             | -1.646 | -3.949 | 0.046  |
| C17                             | -1.614 | -3.816 | 1.405  |
| C18                             | -1.371 | -2.408 | 1.658  |
| C19                             | -1.004 | -0.524 | 3.214  |
| C20                             | -0.876 | -0.025 | 4.562  |
| C21                             | -0.833 | 1.336  | 4.473  |
| C22                             | -0.849 | 1.644  | 3.050  |
| C23                             | -0.493 | 3.175  | 1.130  |
| C24                             | -0.230 | 4.483  | 0.574  |
| C25                             | 0.100  | 4.300  | -0.740 |
| C26                             | -0.066 | 2.895  | -1.010 |
| C27                             | -0.093 | 2.340  | -2.285 |
| H28                             | 0.109  | 2.999  | -3.123 |
| C29                             | -1.273 | -2.338 | -1.850 |
| H30                             | -1.369 | -3.153 | -2.563 |
| C31                             | -1.191 | -1.867 | 2.925  |
| H32                             | -1.250 | -2.534 | 3.777  |
| C33                             | -0.698 | 2.907  | 2.484  |
| H34                             | -0.695 | 3.758  | 3.156  |
| C35                             | -5.152 | 3.903  | -0.573 |
| C36                             | -6.135 | 3.117  | -1.214 |
| C37                             | -3.842 | 3.437  | -0.480 |
| C38                             | -3.408 | 2.173  | -1.026 |
| C39                             | -4.405 | 1.499  | -1.812 |
| C40                             | -5.733 | 1.924  | -1.848 |
| O41                             | -3.920 | 0.471  | -2.559 |
| C42                             | -4.636 | 0.088  | -3.719 |
| H43                             | -4.826 | 0.955  | -4.367 |
| H44                             | -4.003 | -0.633 | -4.239 |
| H45                             | -5.592 | -0.382 | -3.470 |
| H46                             | -6.443 | 1.352  | -2.434 |
| H47                             | -3.083 | 4.073  | -0.031 |
| H48                             | -2.423 | 2.178  | -1.466 |
| H49                             | 3.294  | 0.006  | -0.855 |
| H50                             | -0.665 | 1.108  | -4.817 |
| H51                             | -1.058 | -1.566 | -4.549 |
| H52                             | -1.808 | -4.831 | -0.572 |
| H53                             | -1.774 | -4.516 | 2.237  |
| H54                             | -0.761 | -0.713 | 5.396  |

|     |        |       |        |
|-----|--------|-------|--------|
| H55 | -0.825 | 2.109 | 5.243  |
| H56 | -0.386 | 5.417 | 1.102  |
| H57 | 0.456  | 5.011 | -1.476 |
| H58 | -5.397 | 4.933 | -0.209 |
| H59 | -7.198 | 3.470 | -1.257 |
| &   |        |       |        |

| Snapshot 1 minimum              |        |        |        |
|---------------------------------|--------|--------|--------|
| &zmat Aromatic carbon oxidation |        |        |        |
| C1                              | 2.703  | -0.757 | -0.468 |
| S2                              | 1.714  | -0.259 | 0.983  |
| H3                              | 3.323  | -1.621 | -0.202 |
| H4                              | 2.032  | -1.059 | -1.278 |
| O5                              | -2.313 | 0.445  | 0.249  |
| Fe6                             | -0.715 | 0.178  | 0.385  |
| N7                              | -0.460 | -0.055 | -1.609 |
| N8                              | -0.972 | -1.814 | 0.559  |
| N9                              | -0.716 | 0.395  | 2.370  |
| N10                             | -0.253 | 2.147  | 0.207  |
| C11                             | -0.302 | 0.948  | -2.529 |
| C12                             | -0.531 | 0.462  | -3.865 |
| C13                             | -0.779 | -0.873 | -3.747 |
| C14                             | -0.750 | -1.179 | -2.339 |
| C15                             | -1.170 | -2.716 | -0.448 |
| C16                             | -1.514 | -4.014 | 0.091  |
| C17                             | -1.503 | -3.886 | 1.452  |
| C18                             | -1.147 | -2.507 | 1.718  |
| C19                             | -0.806 | -0.612 | 3.283  |
| C20                             | -0.785 | -0.090 | 4.629  |
| C21                             | -0.754 | 1.271  | 4.522  |
| C22                             | -0.692 | 1.557  | 3.097  |
| C23                             | -0.401 | 3.104  | 1.177  |
| C24                             | -0.207 | 4.424  | 0.610  |
| C25                             | 0.131  | 4.245  | -0.701 |
| C26                             | 0.036  | 2.827  | -0.953 |
| C27                             | 0.009  | 2.268  | -2.223 |
| H28                             | 0.147  | 2.941  | -3.063 |
| C29                             | -1.048 | -2.428 | -1.804 |
| H30                             | -1.213 | -3.234 | -2.513 |
| C31                             | -1.016 | -1.956 | 2.991  |
| H32                             | -1.176 | -2.605 | 3.844  |
| C33                             | -0.609 | 2.826  | 2.528  |
| H34                             | -0.689 | 3.676  | 3.195  |
| C35                             | -5.273 | 4.089  | -0.727 |
| C36                             | -6.223 | 3.259  | -1.332 |
| C37                             | -3.921 | 3.739  | -0.769 |
| C38                             | -3.505 | 2.600  | -1.436 |
| C39                             | -4.438 | 1.808  | -2.108 |
| C40                             | -5.797 | 2.120  | -2.043 |
| O41                             | -3.899 | 0.764  | -2.816 |
| C42                             | -4.700 | 0.111  | -3.775 |
| H43                             | -5.105 | 0.816  | -4.518 |
| H44                             | -4.049 | -0.610 | -4.275 |
| H45                             | -5.537 | -0.424 | -3.312 |
| H46                             | -6.510 | 1.500  | -2.577 |
| H47                             | -3.180 | 4.382  | -0.299 |
| H48                             | -2.466 | 2.323  | -1.490 |
| H49                             | 3.359  | 0.025  | -0.866 |
| H50                             | -0.618 | 1.079  | -4.752 |
| H51                             | -1.012 | -1.590 | -4.526 |
| H52                             | -1.760 | -4.857 | -0.554 |
| H53                             | -1.731 | -4.568 | 2.276  |

|     |        |        |        |     |        |        |        |
|-----|--------|--------|--------|-----|--------|--------|--------|
| H54 | -0.752 | -0.767 | 5.473  | H53 | -1.747 | -4.457 | 2.065  |
| H55 | -0.788 | 2.069  | 5.269  | H54 | -0.959 | -0.602 | 5.241  |
| H56 | -0.371 | 5.370  | 1.121  | H55 | -0.902 | 2.217  | 5.053  |
| H57 | 0.468  | 4.971  | -1.439 | H56 | -0.352 | 5.479  | 0.910  |
| H58 | -5.525 | 5.048  | -0.249 | H57 | 0.569  | 5.035  | -1.638 |
| H59 | -7.291 | 3.552  | -1.322 | H58 | -5.430 | 5.044  | -0.666 |
| &   |        |        |        | H59 | -7.182 | 3.513  | -1.713 |

Snapshot 2 TS

|                                            |        |        |        |
|--------------------------------------------|--------|--------|--------|
| <b>&amp;zmat Aromatic carbon oxidation</b> |        |        |        |
| C1                                         | 2.663  | -0.578 | -0.482 |
| S2                                         | 1.610  | -0.083 | 0.934  |
| H3                                         | 3.260  | -1.449 | -0.181 |
| H4                                         | 2.014  | -0.890 | -1.308 |
| O5                                         | -2.793 | 1.039  | -0.133 |
| Fe6                                        | -1.117 | 0.440  | 0.106  |
| N7                                         | -0.681 | 0.114  | -1.831 |
| N8                                         | -1.317 | -1.622 | 0.327  |
| N9                                         | -1.071 | 0.584  | 2.126  |
| N10                                        | -0.412 | 2.285  | -0.040 |
| C11                                        | -0.405 | 1.081  | -2.770 |
| C12                                        | -0.495 | 0.533  | -4.099 |
| C13                                        | -0.728 | -0.803 | -3.949 |
| C14                                        | -0.866 | -1.047 | -2.539 |
| C15                                        | -1.382 | -2.565 | -0.668 |
| C16                                        | -1.593 | -3.889 | -0.118 |
| C17                                        | -1.601 | -3.749 | 1.240  |
| C18                                        | -1.406 | -2.331 | 1.492  |
| C19                                        | -1.133 | -0.433 | 3.043  |
| C20                                        | -1.021 | 0.076  | 4.391  |
| C21                                        | -0.937 | 1.434  | 4.292  |
| C22                                        | -0.928 | 1.731  | 2.866  |
| C23                                        | -0.500 | 3.240  | 0.945  |
| C24                                        | -0.196 | 4.539  | 0.391  |
| C25                                        | 0.162  | 4.344  | -0.913 |
| C26                                        | -0.032 | 2.943  | -1.187 |
| C27                                        | -0.036 | 2.386  | -2.462 |
| H28                                        | 0.208  | 3.040  | -3.294 |
| C29                                        | -1.175 | -2.297 | -2.010 |
| H30                                        | -1.215 | -3.128 | -2.708 |
| C31                                        | -1.299 | -1.779 | 2.762  |
| H32                                        | -1.392 | -2.443 | 3.614  |
| C33                                        | -0.733 | 2.985  | 2.296  |
| H34                                        | -0.714 | 3.839  | 2.964  |
| C35                                        | -5.153 | 4.003  | -0.992 |
| C36                                        | -6.120 | 3.174  | -1.615 |
| C37                                        | -3.843 | 3.558  | -0.851 |
| C38                                        | -3.374 | 2.260  | -1.326 |
| C39                                        | -4.362 | 1.551  | -2.114 |
| C40                                        | -5.692 | 1.959  | -2.189 |
| O41                                        | -3.850 | 0.521  | -2.822 |
| C42                                        | -4.594 | 0.004  | -3.910 |
| H43                                        | -4.957 | 0.811  | -4.562 |
| H44                                        | -3.897 | -0.632 | -4.454 |
| H45                                        | -5.447 | -0.596 | -3.573 |
| H46                                        | -6.388 | 1.354  | -2.760 |
| H47                                        | -3.101 | 4.230  | -0.428 |
| H48                                        | -2.397 | 2.293  | -1.787 |
| H49                                        | 3.348  | 0.190  | -0.885 |
| H50                                        | -0.512 | 1.100  | -5.017 |
| H51                                        | -0.786 | -1.583 | -4.702 |
| H52                                        | -1.728 | -4.773 | -0.740 |

&

Snapshot 2 minimum

|                                            |        |        |        |
|--------------------------------------------|--------|--------|--------|
| <b>&amp;zmat Aromatic carbon oxidation</b> |        |        |        |
| C1                                         | 2.794  | -0.610 | -0.491 |
| S2                                         | 1.770  | -0.140 | 0.949  |
| H3                                         | 3.433  | -1.456 | -0.208 |
| H4                                         | 2.141  | -0.939 | -1.306 |
| O5                                         | -2.271 | 0.491  | 0.057  |
| Fe6                                        | -0.675 | 0.236  | 0.237  |
| N7                                         | -0.367 | -0.008 | -1.758 |
| N8                                         | -0.911 | -1.762 | 0.418  |
| N9                                         | -0.736 | 0.459  | 2.220  |
| N10                                        | -0.220 | 2.196  | 0.049  |
| C11                                        | -0.210 | 0.987  | -2.687 |
| C12                                        | -0.389 | 0.480  | -4.024 |
| C13                                        | -0.592 | -0.863 | -3.896 |
| C14                                        | -0.604 | -1.148 | -2.483 |
| C15                                        | -1.073 | -2.669 | -0.591 |
| C16                                        | -1.438 | -3.963 | -0.061 |
| C17                                        | -1.471 | -3.832 | 1.299  |
| C18                                        | -1.134 | -2.448 | 1.574  |
| C19                                        | -0.872 | -0.539 | 3.140  |
| C20                                        | -0.894 | 0.001  | 4.480  |
| C21                                        | -0.832 | 1.360  | 4.359  |
| C22                                        | -0.724 | 1.628  | 2.935  |
| C23                                        | -0.384 | 3.160  | 1.009  |
| C24                                        | -0.166 | 4.475  | 0.441  |
| C25                                        | 0.208  | 4.285  | -0.857 |
| C26                                        | 0.101  | 2.867  | -1.107 |
| C27                                        | 0.091  | 2.310  | -2.379 |
| H28                                        | 0.251  | 2.984  | -3.215 |
| C29                                        | -0.904 | -2.393 | -1.944 |
| H30                                        | -1.041 | -3.207 | -2.648 |
| C31                                        | -1.072 | -1.886 | 2.848  |
| H32                                        | -1.279 | -2.532 | 3.694  |
| C33                                        | -0.623 | 2.892  | 2.357  |
| H34                                        | -0.714 | 3.750  | 3.012  |
| C35                                        | -5.283 | 4.200  | -1.122 |
| C36                                        | -6.207 | 3.322  | -1.701 |
| C37                                        | -3.923 | 3.878  | -1.131 |
| C38                                        | -3.471 | 2.718  | -1.738 |
| C39                                        | -4.382 | 1.869  | -2.370 |
| C40                                        | -5.747 | 2.158  | -2.343 |
| O41                                        | -3.821 | 0.807  | -3.029 |
| C42                                        | -4.621 | 0.071  | -3.929 |
| H43                                        | -5.095 | 0.718  | -4.682 |
| H44                                        | -3.940 | -0.625 | -4.422 |
| H45                                        | -5.404 | -0.504 | -3.417 |
| H46                                        | -6.439 | 1.493  | -2.848 |
| H47                                        | -3.206 | 4.567  | -0.692 |
| H48                                        | -2.422 | 2.469  | -1.781 |
| H49                                        | 3.432  | 0.186  | -0.896 |
| H50                                        | -0.456 | 1.076  | -4.931 |
| H51                                        | -0.726 | -1.607 | -4.673 |

|     |        |        |        |     |        |        |        |
|-----|--------|--------|--------|-----|--------|--------|--------|
| H52 | -1.672 | -4.803 | -0.713 | H51 | -1.476 | -1.430 | -5.098 |
| H53 | -1.702 | -4.527 | 2.107  | H52 | -2.364 | -4.641 | -1.146 |
| H54 | -0.922 | -0.655 | 5.342  | H53 | -2.094 | -4.422 | 1.682  |
| H55 | -0.860 | 2.171  | 5.095  | H54 | -1.180 | -0.613 | 4.855  |
| H56 | -0.348 | 5.426  | 0.938  | H55 | -1.163 | 2.218  | 4.716  |
| H57 | 0.588  | 4.992  | -1.590 | H56 | -0.630 | 5.508  | 0.570  |
| H58 | -5.566 | 5.172  | -0.685 | H57 | 0.260  | 5.047  | -2.014 |
| H59 | -7.278 | 3.598  | -1.750 | H58 | -5.680 | 5.206  | -0.572 |
| &   |        |        |        | H59 | -7.519 | 3.869  | -1.703 |

Snapshot 3 TS

&zmat Aromatic carbon oxidation

|     |        |        |        |
|-----|--------|--------|--------|
| C1  | 2.107  | -0.718 | -0.931 |
| S2  | 1.063  | -0.237 | 0.497  |
| H3  | 2.662  | -1.627 | -0.667 |
| H4  | 1.460  | -0.956 | -1.782 |
| O5  | -3.139 | 1.129  | -0.365 |
| Fe6 | -1.473 | 0.491  | -0.232 |
| N7  | -1.168 | 0.187  | -2.192 |
| N8  | -1.793 | -1.549 | -0.031 |
| N9  | -1.400 | 0.623  | 1.777  |
| N10 | -0.746 | 2.321  | -0.387 |
| C11 | -0.831 | 1.142  | -3.123 |
| C12 | -0.973 | 0.624  | -4.457 |
| C13 | -1.334 | -0.684 | -4.325 |
| C14 | -1.466 | -0.942 | -2.914 |
| C15 | -1.960 | -2.463 | -1.035 |
| C16 | -2.148 | -3.795 | -0.499 |
| C17 | -2.022 | -3.695 | 0.858  |
| C18 | -1.794 | -2.284 | 1.121  |
| C19 | -1.431 | -0.404 | 2.680  |
| C20 | -1.283 | 0.088  | 4.028  |
| C21 | -1.212 | 1.449  | 3.944  |
| C22 | -1.240 | 1.764  | 2.521  |
| C23 | -0.812 | 3.277  | 0.597  |
| C24 | -0.485 | 4.572  | 0.041  |
| C25 | -0.133 | 4.368  | -1.264 |
| C26 | -0.358 | 2.972  | -1.534 |
| C27 | -0.392 | 2.422  | -2.810 |
| H28 | -0.130 | 3.066  | -3.643 |
| C29 | -1.834 | -2.176 | -2.386 |
| H30 | -1.960 | -2.994 | -3.089 |
| C31 | -1.600 | -1.750 | 2.388  |
| H32 | -1.639 | -2.425 | 3.235  |
| C33 | -1.047 | 3.021  | 1.951  |
| H34 | -1.017 | 3.875  | 2.619  |
| C35 | -5.454 | 4.201  | -1.014 |
| C36 | -6.472 | 3.457  | -1.650 |
| C37 | -4.151 | 3.706  | -0.964 |
| C38 | -3.764 | 2.419  | -1.508 |
| C39 | -4.817 | 1.753  | -2.238 |
| C40 | -6.124 | 2.237  | -2.268 |
| O41 | -4.387 | 0.663  | -2.912 |
| C42 | -5.300 | -0.082 | -3.690 |
| H43 | -6.146 | -0.426 | -3.086 |
| H44 | -5.680 | 0.503  | -4.538 |
| H45 | -4.742 | -0.943 | -4.063 |
| H46 | -6.864 | 1.678  | -2.828 |
| H47 | -3.369 | 4.322  | -0.532 |
| H48 | -2.794 | 2.393  | -1.985 |
| H49 | 2.831  | 0.039  | -1.277 |
| H50 | -0.889 | 1.192  | -5.371 |

&

Snapshot 3 minimum

&zmat Aromatic carbon oxidation

|     |        |        |        |
|-----|--------|--------|--------|
| C1  | 2.245  | -0.781 | -0.956 |
| S2  | 1.243  | -0.356 | 0.508  |
| H3  | 2.851  | -1.666 | -0.727 |
| H4  | 1.584  | -1.028 | -1.793 |
| O5  | -2.719 | 0.621  | -0.258 |
| Fe6 | -1.133 | 0.285  | -0.144 |
| N7  | -0.895 | 0.055  | -2.146 |
| N8  | -1.471 | -1.684 | 0.025  |
| N9  | -1.130 | 0.496  | 1.836  |
| N10 | -0.576 | 2.226  | -0.323 |
| C11 | -0.654 | 1.042  | -3.064 |
| C12 | -0.878 | 0.568  | -4.406 |
| C13 | -1.218 | -0.747 | -4.291 |
| C14 | -1.244 | -1.049 | -2.881 |
| C15 | -1.709 | -2.568 | -0.986 |
| C16 | -2.023 | -3.874 | -0.455 |
| C17 | -1.925 | -3.781 | 0.906  |
| C18 | -1.585 | -2.398 | 1.179  |
| C19 | -1.228 | -0.511 | 2.748  |
| C20 | -1.186 | 0.012  | 4.091  |
| C21 | -1.127 | 1.372  | 3.986  |
| C22 | -1.074 | 1.660  | 2.560  |
| C23 | -0.712 | 3.192  | 0.639  |
| C24 | -0.461 | 4.504  | 0.073  |
| C25 | -0.093 | 4.305  | -1.228 |
| C26 | -0.236 | 2.891  | -1.476 |
| C27 | -0.266 | 2.340  | -2.750 |
| H28 | -0.075 | 3.005  | -3.587 |
| C29 | -1.606 | -2.280 | -2.342 |
| H30 | -1.804 | -3.084 | -3.043 |
| C31 | -1.428 | -1.857 | 2.454  |
| H32 | -1.550 | -2.518 | 3.302  |
| C33 | -0.955 | 2.925  | 1.989  |
| H34 | -1.015 | 3.781  | 2.652  |
| C35 | -5.536 | 4.383  | -1.142 |
| C36 | -6.524 | 3.590  | -1.733 |
| C37 | -4.192 | 4.012  | -1.240 |
| C38 | -3.826 | 2.862  | -1.916 |
| C39 | -4.804 | 2.056  | -2.503 |
| C40 | -6.150 | 2.421  | -2.421 |
| O41 | -4.326 | 0.949  | -3.151 |
| C42 | -5.245 | 0.045  | -3.723 |
| H43 | -6.000 | -0.283 | -2.996 |
| H44 | -5.757 | 0.477  | -4.595 |
| H45 | -4.661 | -0.818 | -4.048 |
| H46 | -6.892 | 1.799  | -2.909 |
| H47 | -3.423 | 4.635  | -0.792 |
| H48 | -2.793 | 2.555  | -1.995 |
| H49 | 2.912  | 0.018  | -1.293 |

|     |        |        |        |     |        |        |        |
|-----|--------|--------|--------|-----|--------|--------|--------|
| H50 | -0.838 | 1.165  | -5.311 | H49 | 3.570  | -0.208 | -1.118 |
| H51 | -1.427 | -1.457 | -5.080 | H50 | -0.035 | 0.710  | -5.148 |
| H52 | -2.311 | -4.680 | -1.121 | H51 | -0.389 | -1.953 | -4.795 |
| H53 | -2.059 | -4.492 | 1.725  | H52 | -1.270 | -5.049 | -0.699 |
| H54 | -1.157 | -0.668 | 4.935  | H53 | -1.314 | -4.661 | 2.089  |
| H55 | -1.121 | 2.167  | 4.736  | H54 | -0.357 | -0.610 | 5.217  |
| H56 | -0.621 | 5.451  | 0.585  | H55 | -0.310 | 2.145  | 4.838  |
| H57 | 0.276  | 5.004  | -1.980 | H56 | -0.233 | 5.250  | 0.630  |
| H58 | -5.758 | 5.316  | -0.604 | H57 | 0.641  | 4.818  | -1.929 |
| H59 | -7.575 | 3.942  | -1.741 | H58 | -5.777 | 5.344  | -0.168 |
| &   |        |        |        | H59 | -7.647 | 3.948  | -1.216 |

Snapshot 1 TS

| &zmat Hydrogen abstraction |        |        |        |
|----------------------------|--------|--------|--------|
| C1                         | 2.918  | -0.999 | -0.725 |
| S2                         | 1.917  | -0.428 | 0.708  |
| H3                         | 3.521  | -1.867 | -0.434 |
| H4                         | 2.255  | -1.306 | -1.538 |
| O5                         | -2.133 | 0.355  | -0.233 |
| Fe6                        | -0.443 | 0.065  | 0.034  |
| N7                         | -0.137 | -0.238 | -1.945 |
| N8                         | -0.694 | -1.918 | 0.293  |
| N9                         | -0.556 | 0.351  | 2.019  |
| N10                        | -0.028 | 2.023  | -0.218 |
| C11                        | 0.056  | 0.722  | -2.904 |
| C12                        | -0.050 | 0.152  | -4.222 |
| C13                        | -0.264 | -1.184 | -4.046 |
| C14                        | -0.328 | -1.410 | -2.626 |
| C15                        | -0.801 | -2.873 | -0.685 |
| C16                        | -1.088 | -4.163 | -0.100 |
| C17                        | -1.119 | -3.983 | 1.253  |
| C18                        | -0.860 | -2.572 | 1.474  |
| C19                        | -0.590 | -0.622 | 2.984  |
| C20                        | -0.459 | -0.036 | 4.303  |
| C21                        | -0.401 | 1.315  | 4.130  |
| C22                        | -0.457 | 1.538  | 2.696  |
| C23                        | -0.200 | 3.005  | 0.716  |
| C24                        | -0.041 | 4.312  | 0.118  |
| C25                        | 0.301  | 4.105  | -1.186 |
| C26                        | 0.245  | 2.676  | -1.398 |
| C27                        | 0.285  | 2.071  | -2.645 |
| H28                        | 0.441  | 2.714  | -3.506 |
| C29                        | -0.617 | -2.643 | -2.040 |
| H30                        | -0.708 | -3.488 | -2.714 |
| C31                        | -0.776 | -1.975 | 2.733  |
| H32                        | -0.910 | -2.616 | 3.595  |
| C33                        | -0.382 | 2.781  | 2.080  |
| H34                        | -0.427 | 3.660  | 2.712  |
| C35                        | -5.564 | 4.436  | -0.743 |
| C36                        | -6.581 | 3.597  | -1.240 |
| C37                        | -4.223 | 4.092  | -0.898 |
| C38                        | -3.856 | 2.875  | -1.460 |
| C39                        | -4.860 | 2.004  | -1.878 |
| C40                        | -6.210 | 2.378  | -1.818 |
| O41                        | -4.600 | 0.740  | -2.351 |
| C42                        | -3.272 | 0.345  | -2.504 |
| H43                        | -2.691 | 1.025  | -3.139 |
| H44                        | -2.631 | 0.328  | -1.333 |
| H45                        | -3.275 | -0.683 | -2.871 |
| H46                        | -6.936 | 1.675  | -2.218 |
| H47                        | -3.450 | 4.765  | -0.535 |
| H48                        | -2.812 | 2.593  | -1.507 |

&

Snapshot 1 minimum

| &zmat Hydrogen abstraction |        |        |        |
|----------------------------|--------|--------|--------|
| C1                         | 2.954  | -1.081 | -0.724 |
| S2                         | 1.984  | -0.544 | 0.742  |
| H3                         | 3.576  | -1.943 | -0.462 |
| H4                         | 2.272  | -1.386 | -1.523 |
| O5                         | -2.021 | 0.359  | -0.127 |
| Fe6                        | -0.432 | 0.083  | 0.062  |
| N7                         | -0.132 | -0.216 | -1.918 |
| N8                         | -0.655 | -1.902 | 0.322  |
| N9                         | -0.444 | 0.356  | 2.044  |
| N10                        | -0.006 | 2.042  | -0.199 |
| C11                        | 0.024  | 0.751  | -2.883 |
| C12                        | -0.105 | 0.182  | -4.199 |
| C13                        | -0.298 | -1.158 | -4.020 |
| C14                        | -0.333 | -1.386 | -2.599 |
| C15                        | -0.774 | -2.854 | -0.659 |
| C16                        | -1.066 | -4.143 | -0.076 |
| C17                        | -1.096 | -3.967 | 1.277  |
| C18                        | -0.825 | -2.560 | 1.503  |
| C19                        | -0.506 | -0.616 | 3.009  |
| C20                        | -0.397 | -0.026 | 4.325  |
| C21                        | -0.343 | 1.326  | 4.148  |
| C22                        | -0.377 | 1.547  | 2.716  |
| C23                        | -0.181 | 3.025  | 0.739  |
| C24                        | -0.044 | 4.332  | 0.136  |
| C25                        | 0.293  | 4.125  | -1.170 |
| C26                        | 0.242  | 2.696  | -1.378 |
| C27                        | 0.254  | 2.097  | -2.631 |
| H28                        | 0.380  | 2.743  | -3.494 |
| C29                        | -0.608 | -2.621 | -2.014 |
| H30                        | -0.708 | -3.463 | -2.690 |
| C31                        | -0.728 | -1.966 | 2.761  |
| H32                        | -0.887 | -2.602 | 3.623  |
| C33                        | -0.338 | 2.795  | 2.100  |
| H34                        | -0.410 | 3.672  | 2.733  |
| C35                        | -5.595 | 4.351  | -0.766 |
| C36                        | -6.649 | 3.578  | -1.291 |
| C37                        | -4.277 | 3.954  | -0.984 |
| C38                        | -3.973 | 2.789  | -1.691 |
| C39                        | -5.019 | 2.019  | -2.204 |
| C40                        | -6.344 | 2.423  | -2.010 |
| O41                        | -4.870 | 0.871  | -2.931 |
| C42                        | -3.555 | 0.405  | -3.184 |
| H43                        | -3.003 | 1.097  | -3.838 |
| H44                        | -2.991 | 0.261  | -2.255 |
| H45                        | -3.672 | -0.553 | -3.697 |
| H46                        | -7.104 | 1.793  | -2.462 |
| H47                        | -3.464 | 4.562  | -0.595 |

|     |        |        |        |     |        |        |        |
|-----|--------|--------|--------|-----|--------|--------|--------|
| H48 | -2.939 | 2.496  | -1.830 | H47 | -3.878 | 5.150  | -1.206 |
| H49 | 3.581  | -0.270 | -1.120 | H48 | -3.373 | 2.860  | -1.953 |
| H50 | -0.087 | 0.730  | -5.134 | H49 | 2.971  | 0.205  | -1.107 |
| H51 | -0.406 | -1.927 | -4.773 | H50 | -0.905 | 1.166  | -5.224 |
| H52 | -1.265 | -5.026 | -0.675 | H51 | -1.253 | -1.509 | -4.995 |
| H53 | -1.299 | -4.648 | 2.106  | H52 | -2.067 | -4.772 | -1.005 |
| H54 | -0.304 | -0.600 | 5.240  | H53 | -2.019 | -4.482 | 1.811  |
| H55 | -0.276 | 2.161  | 4.852  | H54 | -1.090 | -0.623 | 5.009  |
| H56 | -0.249 | 5.273  | 0.636  | H55 | -1.198 | 2.186  | 4.802  |
| H57 | 0.636  | 4.837  | -1.912 | H56 | -0.795 | 5.479  | 0.685  |
| H58 | -5.787 | 5.264  | -0.178 | H57 | 0.090  | 5.099  | -1.844 |
| H59 | -7.697 | 3.938  | -1.232 | H58 | -6.156 | 5.920  | -0.923 |
| &   |        |        |        | H59 | -8.119 | 4.509  | -1.754 |

Snapshot 2 TS

|                                       |        |        |        |
|---------------------------------------|--------|--------|--------|
| <b>&amp;zmat Hydrogen abstraction</b> |        |        |        |
| C1                                    | 2.298  | -0.560 | -0.702 |
| S2                                    | 1.234  | 0.029  | 0.665  |
| H3                                    | 2.892  | -1.413 | -0.348 |
| H4                                    | 1.664  | -0.902 | -1.526 |
| O5                                    | -2.856 | 0.546  | -0.400 |
| Fe6                                   | -1.167 | 0.305  | -0.100 |
| N7                                    | -0.812 | 0.055  | -2.078 |
| N8                                    | -1.370 | -1.697 | 0.089  |
| N9                                    | -1.316 | 0.526  | 1.892  |
| N10                                   | -0.742 | 2.266  | -0.260 |
| C11                                   | -0.639 | 1.055  | -2.997 |
| C12                                   | -0.805 | 0.552  | -4.337 |
| C13                                   | -1.039 | -0.789 | -4.216 |
| C14                                   | -1.051 | -1.085 | -2.807 |
| C15                                   | -1.533 | -2.611 | -0.919 |
| C16                                   | -1.847 | -3.914 | -0.375 |
| C17                                   | -1.832 | -3.784 | 0.987  |
| C18                                   | -1.528 | -2.392 | 1.248  |
| C19                                   | -1.307 | -0.486 | 2.810  |
| C20                                   | -1.214 | 0.036  | 4.156  |
| C21                                   | -1.218 | 1.394  | 4.050  |
| C22                                   | -1.253 | 1.683  | 2.623  |
| C23                                   | -0.897 | 3.219  | 0.713  |
| C24                                   | -0.651 | 4.535  | 0.164  |
| C25                                   | -0.291 | 4.362  | -1.140 |
| C26                                   | -0.413 | 2.949  | -1.412 |
| C27                                   | -0.388 | 2.391  | -2.680 |
| H28                                   | -0.229 | 3.068  | -3.512 |
| C29                                   | -1.365 | -2.331 | -2.270 |
| H30                                   | -1.494 | -3.149 | -2.972 |
| C31                                   | -1.424 | -1.837 | 2.523  |
| H32                                   | -1.515 | -2.500 | 3.375  |
| C33                                   | -1.146 | 2.948  | 2.058  |
| H34                                   | -1.197 | 3.801  | 2.725  |
| C35                                   | -6.008 | 4.942  | -1.401 |
| C36                                   | -7.073 | 4.116  | -1.806 |
| C37                                   | -4.691 | 4.499  | -1.514 |
| C38                                   | -4.397 | 3.209  | -1.944 |
| C39                                   | -5.454 | 2.360  | -2.272 |
| C40                                   | -6.777 | 2.826  | -2.260 |
| O41                                   | -5.283 | 1.036  | -2.587 |
| C42                                   | -3.988 | 0.527  | -2.681 |
| H43                                   | -3.352 | 1.094  | -3.369 |
| H44                                   | -3.351 | 0.548  | -1.504 |
| H45                                   | -4.070 | -0.527 | -2.950 |
| H46                                   | -7.541 | 2.125  | -2.587 |

&

Snapshot 2 minimum

|                                       |        |        |        |
|---------------------------------------|--------|--------|--------|
| <b>&amp;zmat Hydrogen abstraction</b> |        |        |        |
| C1                                    | 2.335  | -0.575 | -0.709 |
| S2                                    | 1.318  | -0.043 | 0.710  |
| H3                                    | 2.947  | -1.432 | -0.399 |
| H4                                    | 1.676  | -0.900 | -1.520 |
| O5                                    | -2.730 | 0.543  | -0.259 |
| Fe6                                   | -1.137 | 0.303  | -0.059 |
| N7                                    | -0.805 | 0.060  | -2.053 |
| N8                                    | -1.344 | -1.699 | 0.112  |
| N9                                    | -1.182 | 0.516  | 1.917  |
| N10                                   | -0.688 | 2.266  | -0.234 |
| C11                                   | -0.648 | 1.061  | -2.975 |
| C12                                   | -0.825 | 0.560  | -4.316 |
| C13                                   | -1.060 | -0.779 | -4.195 |
| C14                                   | -1.063 | -1.077 | -2.785 |
| C15                                   | -1.526 | -2.603 | -0.896 |
| C16                                   | -1.846 | -3.908 | -0.358 |
| C17                                   | -1.825 | -3.784 | 1.003  |
| C18                                   | -1.500 | -2.397 | 1.272  |
| C19                                   | -1.213 | -0.495 | 2.831  |
| C20                                   | -1.158 | 0.033  | 4.174  |
| C21                                   | -1.166 | 1.392  | 4.065  |
| C22                                   | -1.163 | 1.680  | 2.641  |
| C23                                   | -0.853 | 3.222  | 0.732  |
| C24                                   | -0.639 | 4.540  | 0.175  |
| C25                                   | -0.284 | 4.365  | -1.130 |
| C26                                   | -0.389 | 2.948  | -1.394 |
| C27                                   | -0.387 | 2.395  | -2.663 |
| H28                                   | -0.244 | 3.074  | -3.496 |
| C29                                   | -1.378 | -2.321 | -2.251 |
| H30                                   | -1.523 | -3.134 | -2.955 |
| C31                                   | -1.372 | -1.846 | 2.543  |
| H32                                   | -1.492 | -2.504 | 3.396  |
| C33                                   | -1.093 | 2.947  | 2.078  |
| H34                                   | -1.182 | 3.798  | 2.742  |
| C35                                   | -6.022 | 4.903  | -1.397 |
| C36                                   | -7.113 | 4.144  | -1.859 |
| C37                                   | -4.733 | 4.392  | -1.545 |
| C38                                   | -4.498 | 3.143  | -2.127 |
| C39                                   | -5.585 | 2.410  | -2.613 |
| C40                                   | -6.879 | 2.922  | -2.484 |
| O41                                   | -5.520 | 1.200  | -3.242 |
| C42                                   | -4.266 | 0.534  | -3.292 |
| H43                                   | -3.532 | 1.105  | -3.874 |
| H44                                   | -3.865 | 0.353  | -2.286 |
| H45                                   | -4.456 | -0.416 | -3.800 |

|     |        |        |        |     |        |        |        |
|-----|--------|--------|--------|-----|--------|--------|--------|
| H46 | -7.671 | 2.307  | -2.900 | H45 | -3.926 | -0.553 | -2.773 |
| H47 | -3.883 | 4.965  | -1.179 | H46 | -7.364 | 2.116  | -2.645 |
| H48 | -3.488 | 2.754  | -2.181 | H47 | -3.819 | 5.122  | -0.960 |
| H49 | 2.988  | 0.203  | -1.114 | H48 | -3.252 | 2.855  | -1.737 |
| H50 | -0.918 | 1.171  | -5.211 | H49 | 3.086  | 0.087  | -1.124 |
| H51 | -1.266 | -1.500 | -4.981 | H50 | -0.722 | 1.017  | -5.056 |
| H52 | -2.068 | -4.765 | -0.992 | H51 | -1.314 | -1.580 | -4.845 |
| H53 | -2.015 | -4.482 | 1.824  | H52 | -1.987 | -4.903 | -0.749 |
| H54 | -1.056 | -0.625 | 5.026  | H53 | -1.899 | -4.556 | 2.050  |
| H55 | -1.171 | 2.188  | 4.809  | H54 | -1.018 | -0.666 | 5.209  |
| H56 | -0.791 | 5.485  | 0.690  | H55 | -1.118 | 2.133  | 4.961  |
| H57 | 0.090  | 5.101  | -1.839 | H56 | -0.766 | 5.377  | 0.810  |
| H58 | -6.158 | 5.893  | -0.916 | H57 | 0.120  | 4.972  | -1.738 |
| H59 | -8.145 | 4.530  | -1.772 | H58 | -6.135 | 5.829  | -0.722 |
| &   |        |        |        | H59 | -8.020 | 4.463  | -1.781 |

Snapshot 3 TS

&zmat **Hydrogen abstraction**

|     |        |        |        |
|-----|--------|--------|--------|
| C1  | 2.356  | -0.662 | -0.783 |
| S2  | 1.311  | -0.126 | 0.623  |
| H3  | 2.908  | -1.563 | -0.491 |
| H4  | 1.720  | -0.912 | -1.637 |
| O5  | -2.789 | 0.450  | -0.176 |
| Fe6 | -1.087 | 0.197  | 0.068  |
| N7  | -0.790 | -0.067 | -1.908 |
| N8  | -1.311 | -1.796 | 0.279  |
| N9  | -1.184 | 0.439  | 2.064  |
| N10 | -0.670 | 2.161  | -0.111 |
| C11 | -0.563 | 0.919  | -2.828 |
| C12 | -0.731 | 0.414  | -4.162 |
| C13 | -1.036 | -0.911 | -4.042 |
| C14 | -1.067 | -1.203 | -2.630 |
| C15 | -1.496 | -2.718 | -0.717 |
| C16 | -1.780 | -4.021 | -0.149 |
| C17 | -1.731 | -3.875 | 1.209  |
| C18 | -1.431 | -2.479 | 1.448  |
| C19 | -1.185 | -0.562 | 2.995  |
| C20 | -1.112 | -0.025 | 4.337  |
| C21 | -1.120 | 1.333  | 4.215  |
| C22 | -1.139 | 1.605  | 2.784  |
| C23 | -0.825 | 3.122  | 0.852  |
| C24 | -0.606 | 4.436  | 0.288  |
| C25 | -0.253 | 4.251  | -1.018 |
| C26 | -0.350 | 2.833  | -1.269 |
| C27 | -0.300 | 2.254  | -2.527 |
| H28 | -0.122 | 2.914  | -3.371 |
| C29 | -1.383 | -2.443 | -2.074 |
| H30 | -1.543 | -3.261 | -2.767 |
| C31 | -1.312 | -1.914 | 2.716  |
| H32 | -1.401 | -2.570 | 3.573  |
| C33 | -1.051 | 2.864  | 2.204  |
| H34 | -1.108 | 3.724  | 2.862  |
| C35 | -5.936 | 4.902  | -1.276 |
| C36 | -6.966 | 4.088  | -1.783 |
| C37 | -4.608 | 4.476  | -1.333 |
| C38 | -4.279 | 3.199  | -1.780 |
| C39 | -5.312 | 2.351  | -2.178 |
| C40 | -6.632 | 2.814  | -2.251 |
| O41 | -5.137 | 1.025  | -2.479 |
| C42 | -3.852 | 0.500  | -2.502 |
| H43 | -3.165 | 1.065  | -3.139 |
| H44 | -3.267 | 0.497  | -1.282 |

&

Snapshot 3 minimum

&zmat **Hydrogen abstraction**

|     |        |        |        |
|-----|--------|--------|--------|
| C1  | 2.415  | -0.699 | -0.786 |
| S2  | 1.402  | -0.245 | 0.664  |
| H3  | 3.001  | -1.593 | -0.538 |
| H4  | 1.763  | -0.943 | -1.630 |
| O5  | -2.640 | 0.439  | -0.032 |
| Fe6 | -1.042 | 0.181  | 0.114  |
| N7  | -0.768 | -0.073 | -1.869 |
| N8  | -1.273 | -1.808 | 0.313  |
| N9  | -1.021 | 0.413  | 2.103  |
| N10 | -0.592 | 2.146  | -0.071 |
| C11 | -0.548 | 0.915  | -2.792 |
| C12 | -0.714 | 0.411  | -4.129 |
| C13 | -1.027 | -0.913 | -4.008 |
| C14 | -1.061 | -1.206 | -2.595 |
| C15 | -1.475 | -2.721 | -0.682 |
| C16 | -1.765 | -4.025 | -0.122 |
| C17 | -1.712 | -3.887 | 1.237  |
| C18 | -1.391 | -2.496 | 1.483  |
| C19 | -1.069 | -0.586 | 3.030  |
| C20 | -1.039 | -0.047 | 4.369  |
| C21 | -1.045 | 1.313  | 4.244  |
| C22 | -1.020 | 1.584  | 2.818  |
| C23 | -0.758 | 3.110  | 0.888  |
| C24 | -0.570 | 4.426  | 0.315  |
| C25 | -0.221 | 4.240  | -0.992 |
| C26 | -0.300 | 2.819  | -1.234 |
| C27 | -0.273 | 2.246  | -2.494 |
| H28 | -0.108 | 2.907  | -3.339 |
| C29 | -1.377 | -2.442 | -2.042 |
| H30 | -1.544 | -3.257 | -2.736 |
| C31 | -1.245 | -1.936 | 2.748  |
| H32 | -1.369 | -2.588 | 3.606  |
| C33 | -0.974 | 2.846  | 2.239  |
| H34 | -1.075 | 3.703  | 2.896  |
| C35 | -5.941 | 4.857  | -1.261 |
| C36 | -6.996 | 4.101  | -1.803 |
| C37 | -4.636 | 4.374  | -1.360 |
| C38 | -4.352 | 3.136  | -1.947 |
| C39 | -5.410 | 2.383  | -2.467 |
| C40 | -6.712 | 2.884  | -2.415 |
| O41 | -5.313 | 1.157  | -3.055 |
| C42 | -4.074 | 0.469  | -2.991 |
| H43 | -3.316 | 0.956  | -3.617 |

|     |        |        |        |     |        |        |        |
|-----|--------|--------|--------|-----|--------|--------|--------|
| H44 | -3.703 | 0.396  | -1.962 | H43 | -2.667 | 1.035  | -3.046 |
| H45 | -4.269 | -0.531 | -3.388 | H44 | -2.635 | 0.313  | -1.267 |
| H46 | -7.468 | 2.254  | -2.865 | H45 | -3.240 | -0.685 | -2.822 |
| H47 | -3.814 | 4.954  | -0.944 | H46 | -6.913 | 1.667  | -2.210 |
| H48 | -3.335 | 2.764  | -1.968 | H47 | -3.444 | 4.768  | -0.514 |
| H49 | 3.115  | 0.075  | -1.122 | H48 | -2.800 | 2.580  | -1.442 |
| H50 | -0.700 | 1.010  | -5.031 | H49 | 3.569  | -0.191 | -1.103 |
| H51 | -1.293 | -1.581 | -4.819 | H50 | -0.031 | 0.709  | -5.153 |
| H52 | -1.981 | -4.900 | -0.734 | H51 | -0.391 | -1.956 | -4.796 |
| H53 | -1.889 | -4.569 | 2.072  | H52 | -1.269 | -5.049 | -0.707 |
| H54 | -0.993 | -0.688 | 5.241  | H53 | -1.316 | -4.660 | 2.092  |
| H55 | -1.077 | 2.118  | 4.982  | H54 | -0.363 | -0.612 | 5.220  |
| H56 | -0.749 | 5.369  | 0.825  | H55 | -0.313 | 2.149  | 4.840  |
| H57 | 0.136  | 4.959  | -1.723 | H56 | -0.232 | 5.249  | 0.631  |
| H58 | -6.127 | 5.805  | -0.718 | H57 | 0.640  | 4.822  | -1.932 |
| H59 | -8.037 | 4.472  | -1.777 | H58 | -5.777 | 5.348  | -0.172 |
| &   |        |        |        | H59 | -7.636 | 3.946  | -1.226 |

Snapshot 1 TS (doublet state)

&zmat **Hydrogen abstraction**

|     |        |        |        |
|-----|--------|--------|--------|
| C1  | 2.919  | -0.980 | -0.702 |
| S2  | 1.914  | -0.402 | 0.729  |
| H3  | 3.525  | -1.843 | -0.403 |
| H4  | 2.259  | -1.297 | -1.513 |
| O5  | -2.147 | 0.359  | -0.164 |
| Fe6 | -0.443 | 0.058  | 0.020  |
| N7  | -0.163 | -0.236 | -1.947 |
| N8  | -0.689 | -1.922 | 0.287  |
| N9  | -0.562 | 0.350  | 2.024  |
| N10 | -0.032 | 2.024  | -0.227 |
| C11 | 0.045  | 0.723  | -2.908 |
| C12 | -0.050 | 0.151  | -4.226 |
| C13 | -0.268 | -1.184 | -4.050 |
| C14 | -0.344 | -1.412 | -2.631 |
| C15 | -0.801 | -2.878 | -0.687 |
| C16 | -1.088 | -4.167 | -0.101 |
| C17 | -1.121 | -3.985 | 1.253  |
| C18 | -0.860 | -2.574 | 1.472  |
| C19 | -0.599 | -0.620 | 2.986  |
| C20 | -0.470 | -0.036 | 4.307  |
| C21 | -0.411 | 1.316  | 4.133  |
| C22 | -0.466 | 1.536  | 2.698  |
| C23 | -0.199 | 3.004  | 0.713  |
| C24 | -0.038 | 4.311  | 0.117  |
| C25 | 0.302  | 4.107  | -1.188 |
| C26 | 0.243  | 2.679  | -1.402 |
| C27 | 0.282  | 2.070  | -2.650 |
| H28 | 0.452  | 2.710  | -3.512 |
| C29 | -0.626 | -2.645 | -2.046 |
| H30 | -0.716 | -3.492 | -2.718 |
| C31 | -0.781 | -1.976 | 2.730  |
| H32 | -0.918 | -2.619 | 3.590  |
| C33 | -0.382 | 2.778  | 2.076  |
| H34 | -0.428 | 3.659  | 2.706  |
| C35 | -5.557 | 4.439  | -0.742 |
| C36 | -6.569 | 3.595  | -1.240 |
| C37 | -4.215 | 4.092  | -0.878 |
| C38 | -3.843 | 2.866  | -1.418 |
| C39 | -4.844 | 1.993  | -1.841 |
| C40 | -6.194 | 2.373  | -1.804 |
| O41 | -4.583 | 0.724  | -2.299 |
| C42 | -3.256 | 0.337  | -2.444 |

&

Snapshot 1 minimum (doublet state)

&zmat **Hydrogen abstraction**

|     |        |        |        |
|-----|--------|--------|--------|
| C1  | 2.955  | -1.080 | -0.725 |
| S2  | 1.986  | -0.544 | 0.742  |
| H3  | 3.577  | -1.943 | -0.463 |
| H4  | 2.273  | -1.386 | -1.523 |
| O5  | -2.025 | 0.359  | -0.128 |
| Fe6 | -0.431 | 0.083  | 0.064  |
| N7  | -0.131 | -0.216 | -1.918 |
| N8  | -0.655 | -1.902 | 0.322  |
| N9  | -0.444 | 0.355  | 2.045  |
| N10 | -0.006 | 2.042  | -0.199 |
| C11 | 0.023  | 0.751  | -2.883 |
| C12 | -0.105 | 0.181  | -4.199 |
| C13 | -0.298 | -1.157 | -4.020 |
| C14 | -0.333 | -1.385 | -2.600 |
| C15 | -0.774 | -2.854 | -0.659 |
| C16 | -1.067 | -4.144 | -0.076 |
| C17 | -1.097 | -3.967 | 1.277  |
| C18 | -0.825 | -2.560 | 1.503  |
| C19 | -0.506 | -0.616 | 3.009  |
| C20 | -0.397 | -0.026 | 4.325  |
| C21 | -0.344 | 1.326  | 4.148  |
| C22 | -0.377 | 1.546  | 2.717  |
| C23 | -0.181 | 3.025  | 0.738  |
| C24 | -0.045 | 4.332  | 0.136  |
| C25 | 0.293  | 4.125  | -1.169 |
| C26 | 0.242  | 2.697  | -1.378 |
| C27 | 0.254  | 2.096  | -2.631 |
| H28 | 0.380  | 2.743  | -3.494 |
| C29 | -0.608 | -2.620 | -2.014 |
| H30 | -0.707 | -3.463 | -2.690 |
| C31 | -0.728 | -1.966 | 2.761  |
| H32 | -0.887 | -2.602 | 3.623  |
| C33 | -0.339 | 2.794  | 2.100  |
| H34 | -0.410 | 3.672  | 2.733  |
| C35 | -5.595 | 4.351  | -0.766 |
| C36 | -6.649 | 3.577  | -1.291 |
| C37 | -4.277 | 3.954  | -0.984 |
| C38 | -3.973 | 2.789  | -1.691 |
| C39 | -5.019 | 2.019  | -2.204 |
| C40 | -6.345 | 2.423  | -2.010 |
| O41 | -4.871 | 0.871  | -2.931 |

|     |        |        |        |     |        |        |        |
|-----|--------|--------|--------|-----|--------|--------|--------|
| C42 | -3.554 | 0.404  | -3.185 | H54 | -0.305 | -0.600 | 5.240  |
| H43 | -3.003 | 1.097  | -3.837 | H55 | -0.276 | 2.160  | 4.852  |
| H44 | -2.992 | 0.260  | -2.256 | H56 | -0.249 | 5.273  | 0.636  |
| H45 | -3.671 | -0.553 | -3.698 | H57 | 0.636  | 4.837  | -1.912 |
| H46 | -7.104 | 1.794  | -2.462 | H58 | -5.786 | 5.264  | -0.179 |
| H47 | -3.463 | 4.562  | -0.595 | H59 | -7.697 | 3.939  | -1.232 |
| H48 | -2.939 | 2.496  | -1.829 | &   |        |        |        |
| H49 | 3.581  | -0.270 | -1.120 |     |        |        |        |
| H50 | -0.087 | 0.730  | -5.133 |     |        |        |        |
| H51 | -0.406 | -1.927 | -4.773 |     |        |        |        |
| H52 | -1.265 | -5.026 | -0.675 |     |        |        |        |
| H53 | -1.299 | -4.648 | 2.106  |     |        |        |        |



IV. Figures

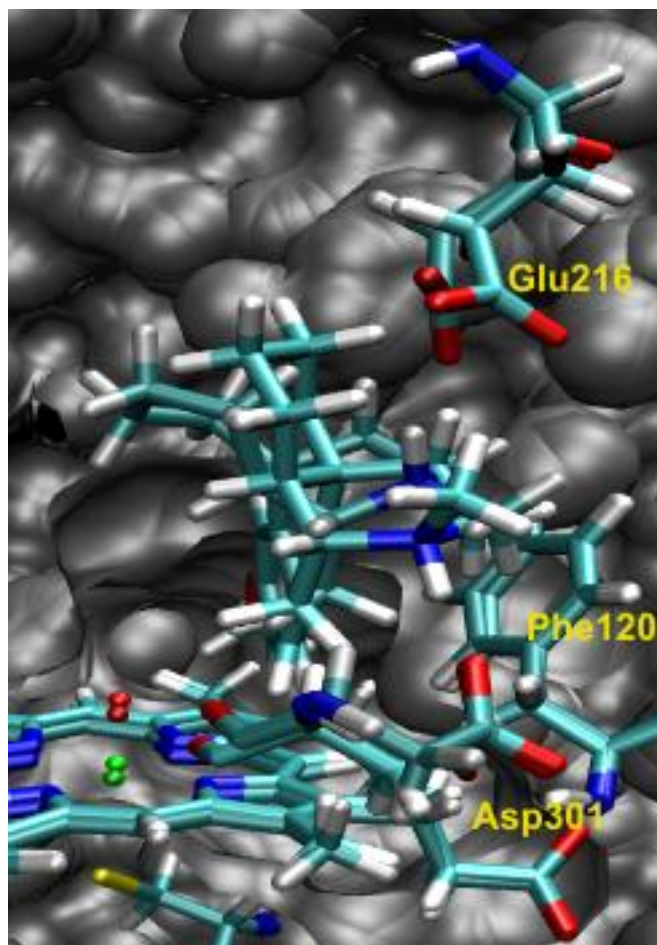

Fig. S1. Dextromethorphan docked into the active site of P450 2D6. The two stereoisomers of the protonated Dextromethorphan can interact either with Glu216 or with Asp301.

**A**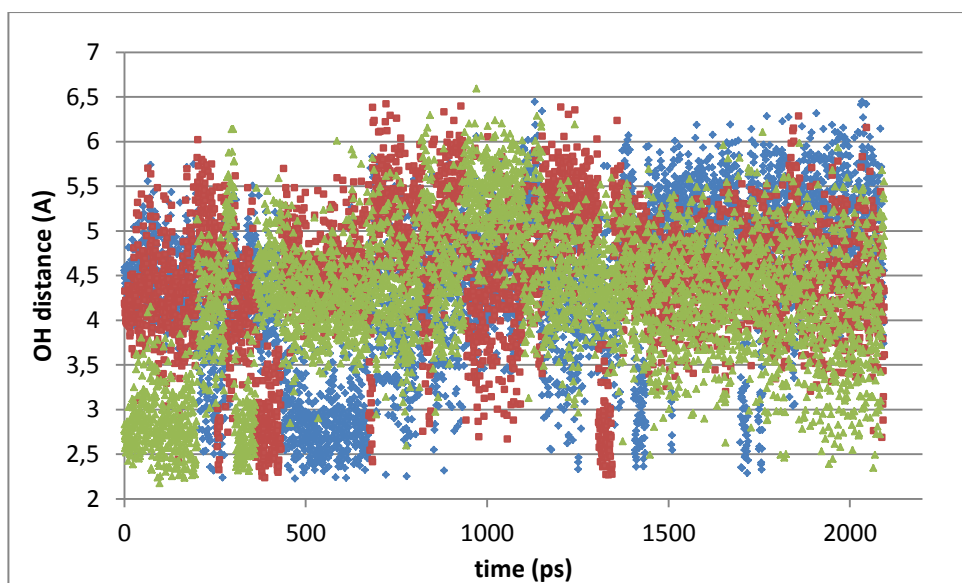**B**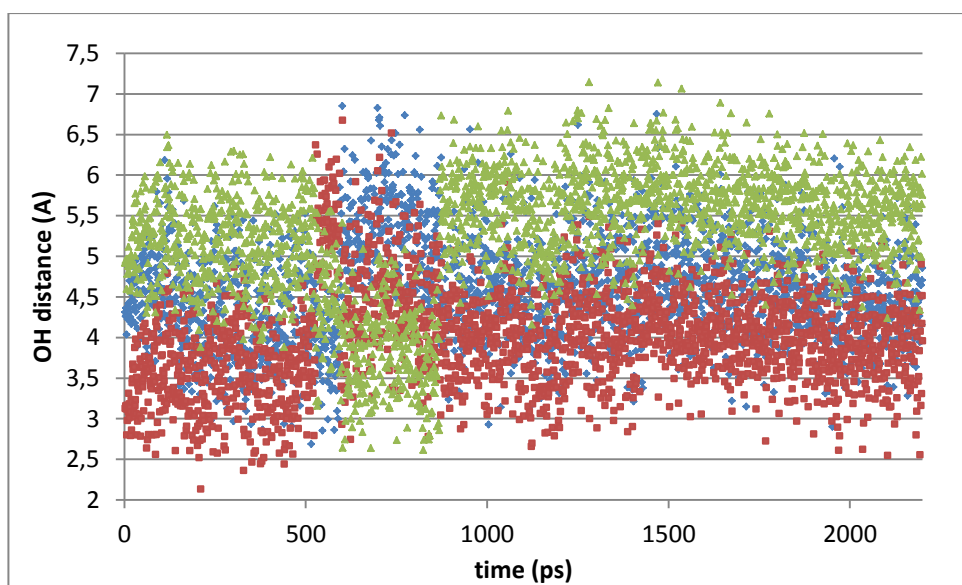

Fig.S2. Distances measured in the MD simulations of P450 2D6 with dextromethorphan docked into the active site. The OH distances were measured between the ferryl-oxygen atom and the alpha-hydrogen atoms (the three colors in the diagrams correspond to the three alpha-hydrogen atoms) A: The protonated amino-group of dextromethorphan interacts with Glu216. B: protonated amino-group of dextromethorphan interacts with Asp301.

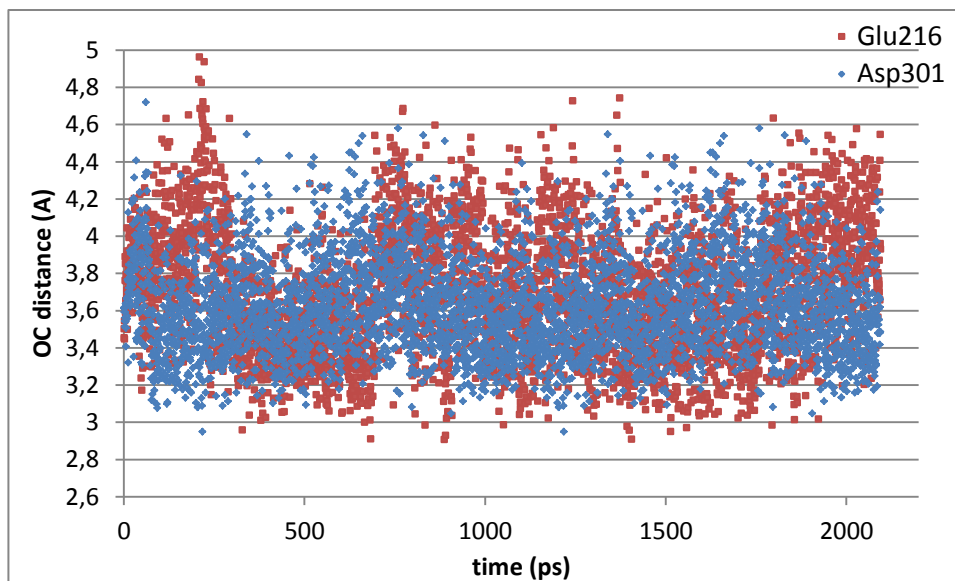

Fig.S3. Distances measured in the MD simulations of P450 2D6 with dextromethorphan docked into the active site. The OC distances were measured between the ferryl-oxygen atom and the *ortho* carbon atoms. red: simulation in which hydrogen bond exists between Glu216 and dextromethorphan blue: simulation in which hydrogen bond exists between Asp301 and dextromethorphan

A

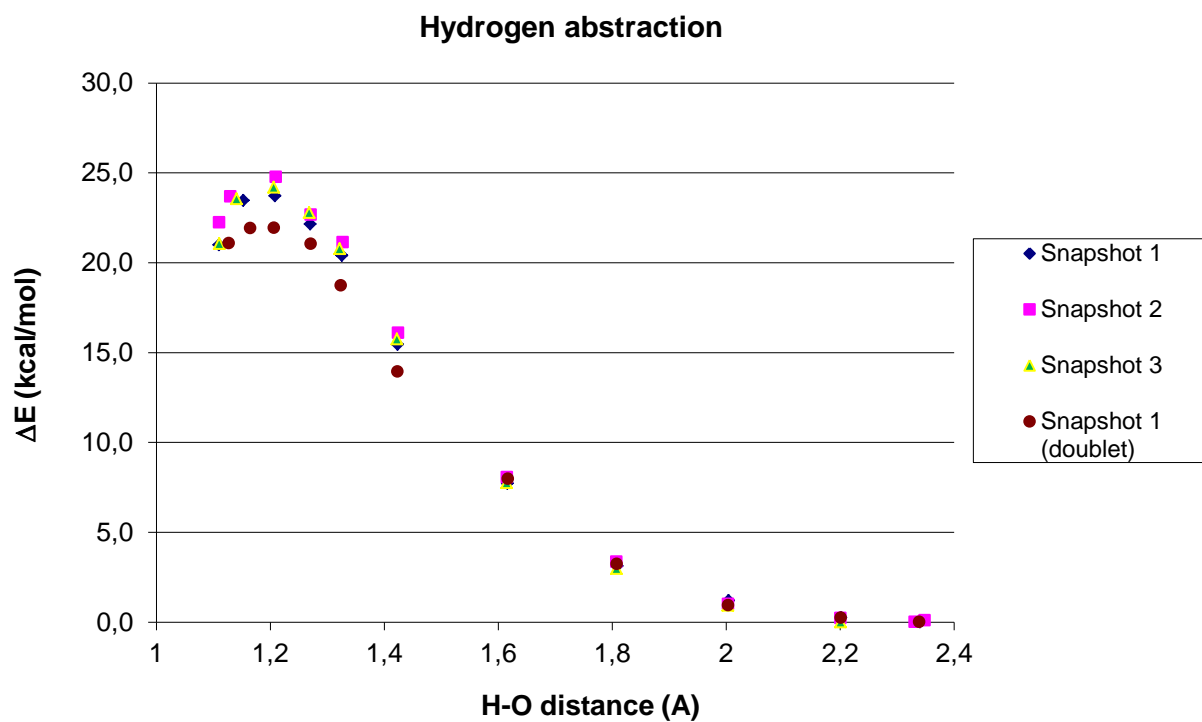

B

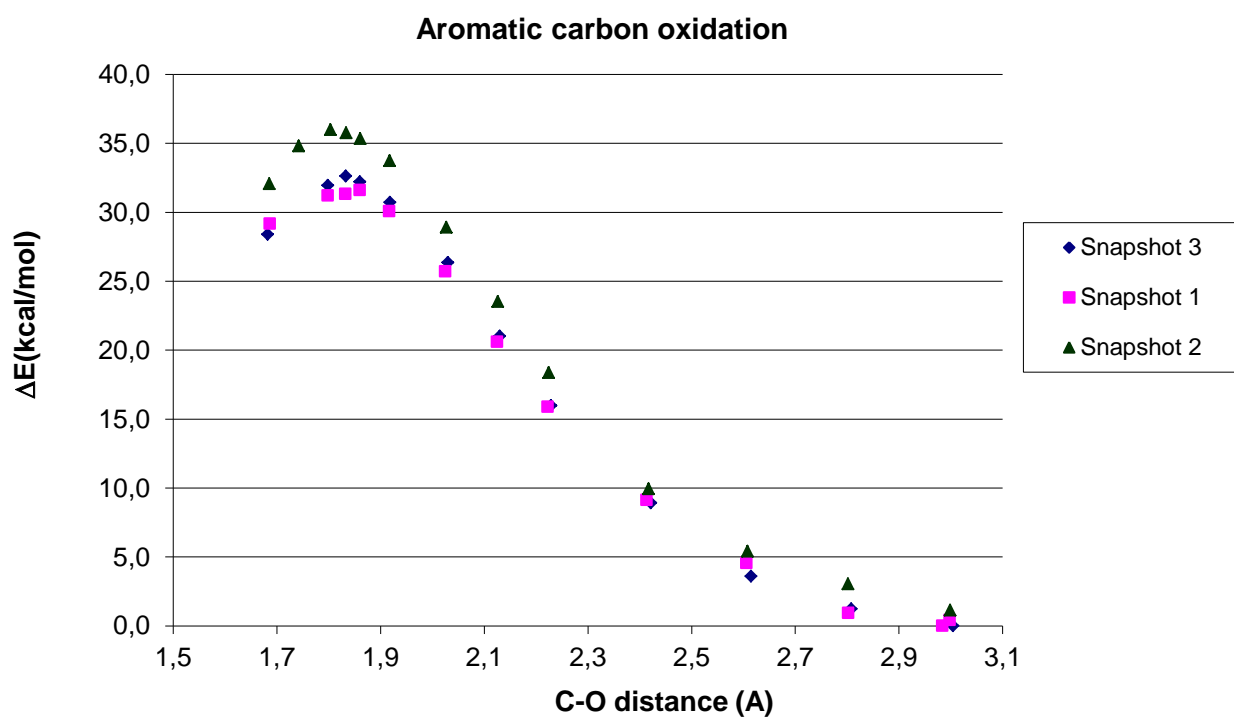

Fig.S4. QM/MM adiabatic energy scan profiles for A. hydrogen-abstraction B. aromatic carbon oxidation.

V. Table S1. Selected geometrical parameters of QM only transition states (at the B3LYP/LACVP\*\* level) and QM/MM optimized starting structures and transition states.

|                                          |                                 |                 | <b>C<sub>2</sub>-O<br/>(oxyl)</b> | <b>CH</b> | <b>OH</b> |
|------------------------------------------|---------------------------------|-----------------|-----------------------------------|-----------|-----------|
| <b>Aromatic<br/>carbon<br/>oxidation</b> | QM                              | TS<br>(doublet) | 1.940                             |           |           |
|                                          |                                 | TS<br>(quartet) | 1.861                             |           |           |
|                                          | Snapshot 1                      | TS              | 1.860                             |           |           |
|                                          |                                 | minimum         | 2.984                             |           |           |
|                                          | Snapshot 2                      | TS              | 1.803                             |           |           |
|                                          |                                 | minimum         | 3.102                             |           |           |
|                                          | Snapshot 3                      | TS              | 1.833                             |           |           |
|                                          |                                 | minimum         | 2.999                             |           |           |
|                                          | <b>Hydrogen<br/>abstraction</b> | QM              | TS<br>(doublet)                   |           | 1.258     |
| TS<br>(quartet)                          |                                 |                 |                                   | 1.348     | 1.194     |
| Snapshot 1                               |                                 | TS              |                                   | 1.335     | 1.209     |
|                                          |                                 | minimum         |                                   | 1.097     | 2.340     |
| Snapshot 2                               |                                 | TS              |                                   | 1.338     | 1.210     |
|                                          |                                 | minimum         |                                   | 1.098     | 2.331     |
| Snapshot 3                               |                                 | TS              |                                   | 1.352     | 1.206     |
|                                          |                                 | minimum         |                                   | 1.096     | 2.204     |
| Snapshot 1<br>doublet <sup>+</sup>       |                                 | TS<br>minimum   |                                   | 1.331     | 1.207     |
|                                          |                                 |                 | 1.096                             | 2.339     |           |

<sup>+</sup> this profile was started from the same geometry as Snapshot 1, and the profile was followed in the doublet state. (It is not the reoptimization of the structures obtained in the quartet energy profile).
